# Supplementary material for: GADL1 is a multifunctional decarboxylase with tissue-specific roles in β-alanine and carnosine production
Source: PubMed Central journal article supplement (PMC7367687; doi:10.1126/sciadv.abb3713), 2020-07-17
Supplement: abb3713_SM.pdf [file abb3713_SM.pdf]

[advances.sciencemag.org/cgi/content/full/6/29/eabb3713/DC1](https://advances.sciencemag.org/cgi/content/full/6/29/eabb3713/DC1)

## Supplementary Materials for

### **GADL1 is a multifunctional decarboxylase with tissue-specific roles in $\beta$ -alanine and carnosine production**

Elaheh Mahootchi, Selina Cannon Homaei, Rune Kleppe, Ingeborg Winge, Tor-Arne Hegvik, Roberto Megias-Perez, Christian Totland, Floriana Mogavero, Anne Baumann, Jeffrey Colm Glennon, Hrvoje Miletic, Petri Kursula, Jan Haavik\*

\*Corresponding author. Email: [jan.haavik@uib.no](mailto:jan.haavik@uib.no)

Published 17 July 2020, *Sci. Adv.* **6**, eabb3713 (2020)  
DOI: 10.1126/sciadv.abb3713

#### **The PDF file includes:**

Tables S1, S3 to S5  
Figs. S1 to S5  
References

#### **Other Supplementary Material for this manuscript includes the following:**

(available at [advances.sciencemag.org/cgi/content/full/6/29/eabb3713/DC1](https://advances.sciencemag.org/cgi/content/full/6/29/eabb3713/DC1))

Table S2

**Table S1 A. Top 25 upregulated genes in OB tissue samples from *Gad1<sup>-/-</sup>* compared to *Gad1<sup>+/+</sup>* mice.**

| ENSEMBL ID         | Abbreviation       | Name                                              | Log2Fold | P-value |
|--------------------|--------------------|---------------------------------------------------|----------|---------|
| ENSMUSG00000032226 | <i>Gent3</i>       | Glucosaminyl (N-acetyl) transferase 3, mucin type | 6.05     | 0.00084 |
| ENSMUSG00000020159 | <i>Gabrp</i>       | $\gamma$ -aminobutyric acid (GABA) A receptor, pi | 5.77     | 0.01167 |
| ENSMUSG00000085224 | <i>Gm13425</i>     | Predicted gene 13425                              | 5.40     | 0.00262 |
| ENSMUSG00000038805 | <i>Six3</i>        | Sine oculis-related homeobox 3                    | 5.23     | 0.00077 |
| ENSMUSG00000093894 | <i>Ighv1-53</i>    | Immunoglobulin heavy variable 1-53                | 5.22     | 0.02869 |
| ENSMUSG00000096225 | <i>Lhx8</i>        | LIM homeobox protein 8                            | 5.17     | 0.00055 |
| ENSMUSG00000045620 | <i>Odf31l</i>      | Outer dense fiber of sperm tails 3-like 1         | 4.97     | 0.00314 |
| ENSMUSG00000061959 | <i>Ces1e</i>       | Carboxylesterase 1E                               | 4.91     | 0.00405 |
| ENSMUSG00000004341 | <i>Gpx6</i>        | Glutathione peroxidase 6                          | 4.86     | 0.00372 |
| ENSMUSG00000029866 | <i>Kel</i>         | Kell blood group                                  | 4.67     | 0.00028 |
| ENSMUSG00000046975 | <i>Olf1020</i>     | Olfactory receptor 1020                           | 4.57     | 0.01397 |
| ENSMUSG00000027902 | <i>Chil6</i>       | Chitinase like 6                                  | 4.55     | 0.00405 |
| ENSMUSG00000024681 | <i>Ms4a3</i>       | Membrane-spanning 4-domains A3                    | 4.49     | 0.02221 |
| ENSMUSG00000112343 | <i>Sfta3-ps</i>    | Surfactant associated 3, pseudogene               | 4.38     | 0.02155 |
| ENSMUSG00000082308 | <i>Gm15770</i>     | Predicted gene 15770                              | 4.36     | 0.03261 |
| ENSMUSG00000083986 | <i>Gm12213</i>     | Predicted gene 12213                              | 4.36     | 0.02563 |
| ENSMUSG00000090475 | <i>Gm6245</i>      | Predicted gene 6245                               | 4.36     | 0.02527 |
| ENSMUSG00000074665 | <i>Bpifb4</i>      | BPI fold containing family B4                     | 4.35     | 0.01778 |
| ENSMUSG00000073920 | <i>Olf1661</i>     | Olfactory receptor 661                            | 4.30     | 0.02962 |
| ENSMUSG00000058884 | <i>Olf1025-ps1</i> | Olfactory receptor 1025, pseudogene 1             | 4.30     | 0.03356 |
| ENSMUSG00000087340 | <i>Gm15228</i>     | Predicted gene 15228                              | 4.25     | 0.02579 |
| ENSMUSG00000094872 | <i>Igkv9-120</i>   | Immunoglobulin kappa chain variable 9-120         | 4.22     | 0.01533 |
| ENSMUSG00000066108 | <i>Muc5b</i>       | Mucin 5, subtype B, tracheobronchial              | 4.21     | 0.00077 |
| ENSMUSG00000105906 | <i>Iglc1</i>       | Immunoglobulin lambda constant 1                  | 4.18     | 0.01064 |
| ENSMUSG00000095765 | <i>Olf1741</i>     | Olfactory receptor 741                            | 4.16     | 0.00863 |

**Table S1 B. Top 25 downregulated genes in OB tissue samples from *Gad11*<sup>-/-</sup> compared to *Gad11*<sup>+/+</sup> mice.**

| ENSEMBL ID          | Abbreviation         | Name                                              | Log2Fold | P-value |
|---------------------|----------------------|---------------------------------------------------|----------|---------|
| ENSMUSG00000022485  | <i>Hoxc5</i>         | Homeobox Protein Hox C5                           | -8.25    | 0.00033 |
| ENSMUSG00000038700  | <i>Hoxb5</i>         | Homeobox Protein Hox B5                           | -7.65    | 0.00325 |
| ENSMUSG00000087658  | <i>Hotairm1</i>      | Hoxa transcript antisense RNA, myeloid-specific 1 | -6.90    | 0.00079 |
| ENSMUSG00000038253  | <i>Hoxa5</i>         | Homeobox Protein Hox A5                           | -6.46    | 0.00381 |
| ENSMUSG00000056423  | <i>Uts2b</i>         | Urotensin-2B                                      | -6.04    | 0.00188 |
| ENSMUSG00000048763  | <i>Hoxb3</i>         | Homeobox Protein Hox B3                           | -5.99    | 0.00081 |
| ENSMUSG00000001661  | <i>Hoxc6</i>         | Homeobox Protein Hox C6                           | -5.97    | 0.01110 |
| ENSMUSG00000056468  | <i>5730596B20Rik</i> | RIKEN cDNA 5730596B20 gene                        | -5.84    | 0.03447 |
| ENSMUSG00000084844  | <i>Hoxb3os</i>       | Homeobox B3 and homeobox B2, opposite strand      | -5.76    | 0.03083 |
| ENSMUSG00000075394  | <i>Hoxc4</i>         | Homeobox Protein Hox C4                           | -5.67    | 0.00327 |
| ENSMUSG00000085696  | <i>Hoxaas3</i>       | Hoxa cluster antisense RNA 3                      | -5.02    | 0.00906 |
| ENSMUSG00000060738  | <i>Prl7c1</i>        | Prolactin 7c1                                     | -4.85    | 0.00353 |
| ENSMUSG00000005503  | <i>Evx1</i>          | Even-skipped homeobox 1                           | -4.65    | 0.03972 |
| ENSMUSG00000067684  | <i>Obpl1a</i>        | Odorant binding protein IA                        | -4.55    | 0.02233 |
| ENSMUSG00000001670  | <i>Tat</i>           | Tyrosine aminotransferase                         | -4.48    | 0.02410 |
| ENSMUSG000000103430 | <i>Gm36996</i>       | Predicted gene 36996                              | -4.45    | 0.01718 |
| ENSMUSG000000108282 | <i>Gm44317</i>       | Predicted gene 44317                              | -4.41    | 0.01906 |
| ENSMUSG00000026976  | <i>Pax8</i>          | Paired box 8                                      | -4.29    | 0.00069 |
| ENSMUSG00000038155  | <i>Gstp2</i>         | Glutathione S-transferase, pi 2                   | -4.28    | 0.03740 |
| ENSMUSG00000042279  | <i>H1foo</i>         | H1.8 linker histone                               | -4.27    | 0.02103 |
| ENSMUSG000000109753 | <i>Gm45633</i>       | Predicted gene 45633                              | -4.26    | 0.02596 |
| ENSMUSG000000041333 | <i>Mup4</i>          | Major urinary protein 4                           | -4.26    | 0.02462 |
| ENSMUSG00000073242  | <i>Dnmt3aos</i>      | DNA methyltransferase 3A, opposite strand         | -4.18    | 0.02929 |
| ENSMUSG00000074385  | <i>Gm10684</i>       | Predicted gene 10684                              | -4.14    | 0.00057 |
| ENSMUSG00000029844  | <i>Hoxa1</i>         | Homeobox Protein Hox A1                           | -4.11    | 0.03148 |

**Table S1 C. Transcript levels of 30 predicted genes close to the *Gad11* locus** (yellow: downregulated in knockout, green: upregulated in knockout, blank: not detected).

| Gene name                     | ENSEMBL ID         | Log2FoldChange | P-value     |
|-------------------------------|--------------------|----------------|-------------|
| <i>Loc102633324 (Gm16142)</i> | ENSMUSG00000087469 | -1.145644169   | 0.331003828 |
| <i>Loc102633106 (Gm31014)</i> |                    |                |             |
| <i>Loc102633399 (Gm31234)</i> |                    |                |             |
| <i>Loc102633476 (Gm31292)</i> |                    |                |             |
| <i>Tgfbr2</i>                 | ENSMUSG00000032440 | 0.153321074    | 0.11705412  |
| <i>Gm9385</i>                 | ENSMUSG00000080848 | -0.131387484   | 0.400319186 |
| <i>Gm5921</i>                 | ENSMUSG00000074034 | -0.062966245   | 0.955064616 |
| <i>Gm9385</i>                 | ENSMUSG00000080848 | -0.131387484   | 0.400319186 |
| <i>Rbms3</i>                  | ENSMUSG00000039607 | -0.041538879   | 0.816216697 |
| <i>Cmc1</i>                   | ENSMUSG00000039163 | 0.043065942    | 0.678703046 |
| <i>Azi2</i>                   | ENSMUSG00000039285 | 0.113416692    | 0.251718473 |
| <i>Stt3b</i>                  | ENSMUSG00000032437 | 0.143339379    | 0.156764486 |
| <i>Gm18328</i>                |                    |                |             |
| <i>Gm40582</i>                |                    |                |             |
| <i>d73003k21rik</i>           |                    |                |             |
| <i>Gm39447</i>                |                    |                |             |
| <i>Gm40587</i>                |                    |                |             |
| <i>Mir467h</i>                |                    |                |             |
| <i>Gm9487</i>                 |                    |                |             |
| <i>4930428G15rik</i>          |                    |                |             |
| <i>Gm30762</i>                |                    |                |             |
| <i>Stmn1-rs1</i>              |                    |                |             |
| <i>Gm31599</i>                |                    |                |             |
| <i>Gm39449</i>                |                    |                |             |
| <i>Gm18489</i>                |                    |                |             |
| <i>Gm39452</i>                |                    |                |             |
| <i>Loc102635502</i>           |                    |                |             |
| <i>Gm36451</i>                |                    |                |             |
| <i>Gm39450</i>                |                    |                |             |
| <i>Loc108167721</i>           |                    |                |             |
| <i>Gm4668</i>                 |                    |                |             |
| <i>Gm48038</i>                |                    |                |             |
| <i>Gm31410</i>                |                    |                |             |

**Table S1 D. Transcript levels of ABAT or AGXT2 in the OB extracts of *Gad11*<sup>+/+</sup> and *Gad11*<sup>-/-</sup> mice.** (yellow: downregulated in knockout, green: upregulated in knockout, blank: not detected).

| Gene name    | ENSEMBL ID         | Log2FoldChange | P-value     |
|--------------|--------------------|----------------|-------------|
| <i>Abat</i>  | ENSMUSG00000057880 | 0.063686739    | 0.554421048 |
| <i>Agxt2</i> | ENSMUSG00000089678 | -1.638874888   | 0.686109037 |

**Table S3. Overview of the data used for genetic analysis using MAGMA software.**

| phenotype                         | Sample size* | Reference and data source                                                                                                                                                    |
|-----------------------------------|--------------|------------------------------------------------------------------------------------------------------------------------------------------------------------------------------|
| Neuropsychiatric                  |              |                                                                                                                                                                              |
| ADHD**                            | 53,293       | Demontis et al. (64)                                                                                                                                                         |
| Alzheimer's disease               | 452,010      | Jansen et al. (67)                                                                                                                                                           |
| ALS***                            | 80,610       | Nicolas et al.(70, 75)                                                                                                                                                       |
| Anorexia                          | 72,517       | Watson et al.(75)                                                                                                                                                            |
| Anxiety                           | 18,186       | Otowa et al. (71)                                                                                                                                                            |
| Autism                            | 46,351       | Grove et al. (66)                                                                                                                                                            |
| Bipolar disorder                  | 51,710       | Stahl et al. (72)                                                                                                                                                            |
| Depression                        | 173,005      | Wray et al. (76)                                                                                                                                                             |
| Educational attainment            | 766,345      | Lee et al. (68)                                                                                                                                                              |
| Epilepsy                          | 34,852       | International League Against Epilepsy Consortium on Complex Epilepsies (79)                                                                                                  |
| Parkinson's disease               | 482,730      | Nalls et al. (69)                                                                                                                                                            |
| Schizophrenia                     | 77,096       | Ripke et al. (81)                                                                                                                                                            |
| SWB****                           | 298,420      | Okbay et al. (82)                                                                                                                                                            |
| Acetyl carnosine (in blood serum) | 6279         | Shin et al. (27)                                                                                                                                                             |
| AMD                               | 33,976       | Fritsche et al (65)                                                                                                                                                          |
| Body mass index                   | 795,640      | Yengo et al. (78)                                                                                                                                                            |
| Coronary heart disease            | 547,261      | van der Harst & Verweij (74)                                                                                                                                                 |
| Muscular strength*****            | 335,842      | UKBIOBANK <a href="http://www.nealelab.is/uk-biobank">http://www.nealelab.is/uk-biobank</a><br><a href="http://ldsc.broadinstitute.org/">http://ldsc.broadinstitute.org/</a> |
| Type 2 diabetes                   | 605,056      | Xue et al. (77)                                                                                                                                                              |
| Kidney function*                  | 567,460      | Wuttke et al. (39)                                                                                                                                                           |
| UACR in diabetes**                | 5826         | Teumer et al.(73)                                                                                                                                                            |

\*Maximum total sample size

\*\* Attention-deficit/hyperactivity disorder

\*\*\* Amyotrophic lateral sclerosis

\*\*\*\* Subjective well-being

\*\*\*\*\* Age-related macular degeneration

\*\*\*\*\* Right hand grip strength

\* glomerular filtration rate estimated from serum creatinine (eGFR)

\*\* urinary albumin-to-creatinine ratio among individuals with diabetes

**Table S4. Analysis of mouse diet**

| <b>Parameter analyzed</b>            | <b>Result (g/kg)</b> |
|--------------------------------------|----------------------|
| 1-Methylhistidine (Free)             | <0.5                 |
| 3-Methylhistidine (Free)             | <0.5                 |
| Alanine (Free)                       | <0.5                 |
| Alpha-Aminoadipic acid (Free)        | <0.5                 |
| Alpha-Amino-n-butyric acid (Free)    | <0.5                 |
| Anserine (Free)                      | <0.5                 |
| Arginine (Free)                      | <0.5                 |
| Asparagine (Free)                    | 0.535                |
| Aspartic Acid (Free)                 | <0.5                 |
| $\beta$ -Alanine (Free)              | <0.5                 |
| $\beta$ -Aminoisobutyric acid (Free) | <0.5                 |
| Carnosine                            | <0.5                 |
| Citrulline                           | <0.5                 |
| Cystathionine (Free)                 | <0.5                 |
| Cystin (Free)                        | <0.5                 |
| Delta-Hydroxylysine (Free)           | <0.5                 |
| Ethanolamine                         | <0.5                 |
| $\gamma$ -Amino-butyric acid (Free)  | <0.5                 |
| Glutamic acid (Free)                 | <0.5                 |
| Glutamine (Free)                     | <0.5                 |
| Glycine (Free)                       | <0.5                 |
| Histidine (Free)                     | <0.5                 |
| Homocysteine (Free)                  | <0.5                 |
| Hydroxyproline (Free)                | <0.5                 |
| Isoleucine (Free)                    | <0.5                 |
| Leucine (Free)                       | <0.5                 |
| Lysine (Free)                        | 0.843                |
| Methionine (Free)                    | <0.5                 |
| Ornithine (Free)                     | <0.5                 |
| Phenylalanine (Free)                 | <0.5                 |
| Phosphoethanolamine (Free)           | <0.5                 |
| Phosphoserine (Free)                 | <0.5                 |
| Proline (Free)                       | <0.5                 |
| Sarcosine (Free)                     | <0.5                 |
| Serine (Free)                        | <0.5                 |
| Taurine (Free)                       | <0.5                 |
| Threonine (Free)                     | <0.5                 |
| Tryptophan (Free)                    | <0.5                 |
| Tyrosine (Free)                      | <0.5                 |
| Urea                                 | <0.5                 |

**Table S5. Sequences of PCR primers and sizes of PCR products.**

| <b>Primer</b>  | <b>Primer Sequence<br/>5'-3'</b> | <b>PCR Product Size</b> |           |
|----------------|----------------------------------|-------------------------|-----------|
|                |                                  | <b>WT</b>               | <b>KO</b> |
| 136258Cre-HAA2 | TCAGTTGAGAAGCCCTTCCTTGGTGTA      | 330 and 750<br>bp       | 166 bp    |
| 136249Cre-HAA2 | CCTTGAACGTGGTTCTCTAGTAGCCACC     |                         |           |
| 136248Cre-HAA2 | AGACCTGGTTAAGCAACTCTCCACTAACTCC  |                         |           |

# Supplementary Figures

**A**

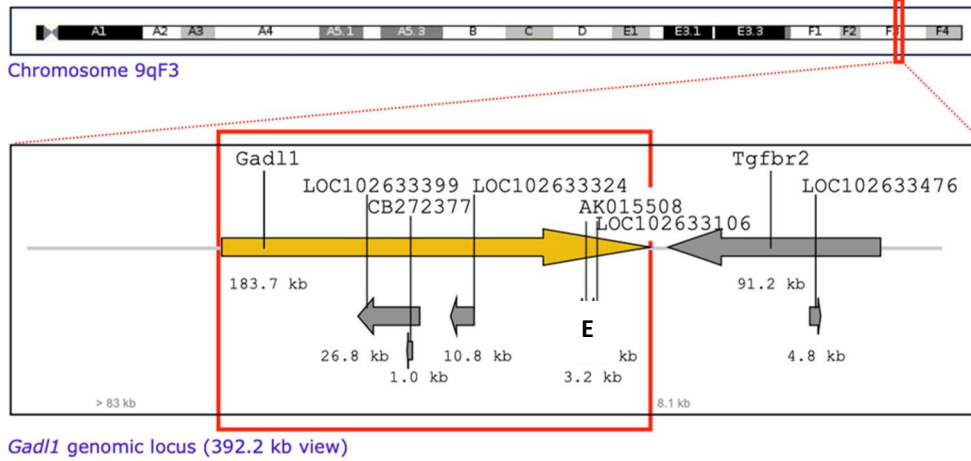

**B**

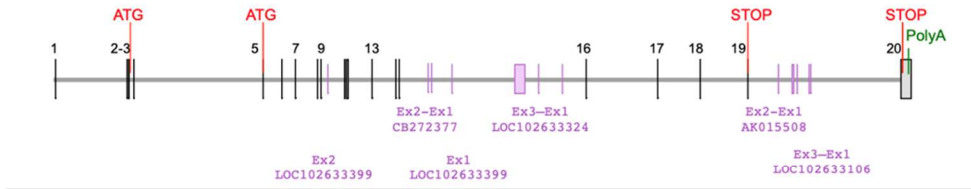

**C**

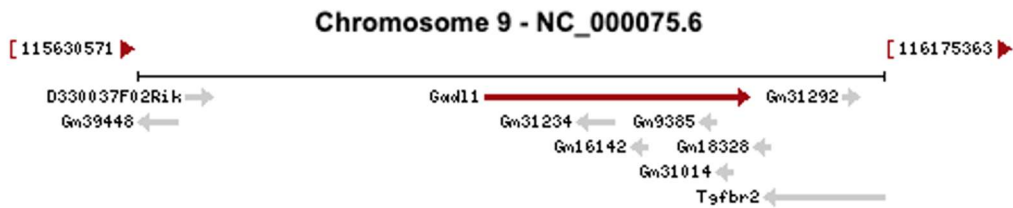

**D**

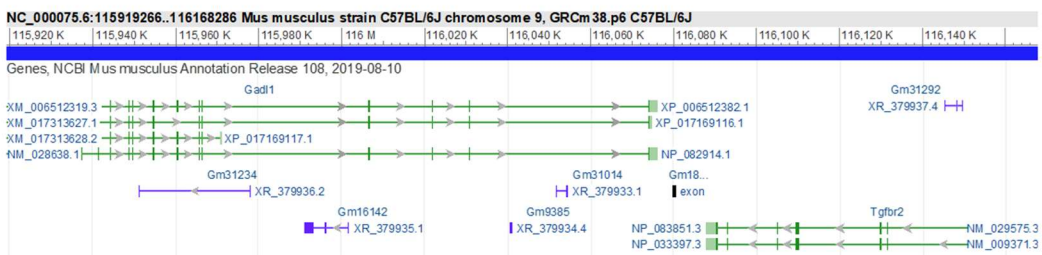

**E**

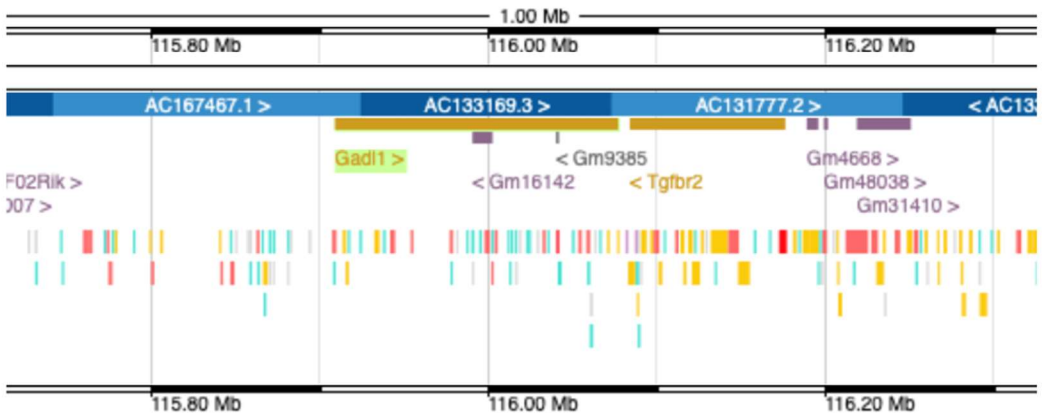



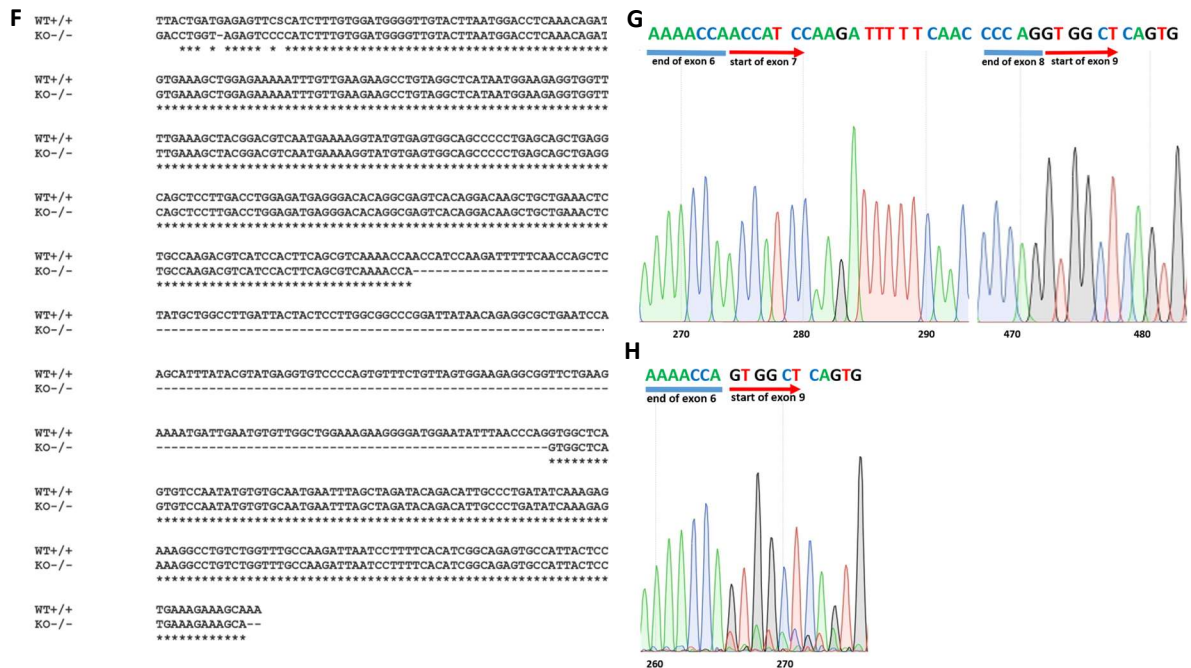

**Fig. S1. Overview of the mouse *Gad1* locus (A, B, C, D and E) and sequencing alignment of *Gad1*<sup>+/+</sup> and *Gad1*<sup>-/-</sup> mRNA confirming that exon 7 and 8 are missing from the *Gad1*<sup>-/-</sup> muscle transcript (F, G and H). (A) *Gad1* genomic locus in mouse chromosome as analyzed at Genway, (B) overview of exon organization using Genway software, (C) overview of *Gad1* locus from NCBI gene database, (D) *Gad1* and closest neighboring genes (NCBI), (E) *Gad1* and closest neighboring genes (EMBL-EBI). (F) Alignment of mRNA sequences of the *Gad1*<sup>+/+</sup> and *Gad1*<sup>-/-</sup> mice. Cluster omega was used for alignment (<https://www.ebi.ac.uk/Tools/msa/muscle/>). (G-H) Sequencing chromatogram of (G) *Gad1*<sup>+/+</sup> and (H) *Gad1*<sup>-/-</sup> mice. Exon 7 and 8 are missing in the *Gad1*<sup>-/-</sup> mice mRNA. Created in SnapGene (v4.2, GSL Biotech LLC, San Diego, CA 92108, USA).**

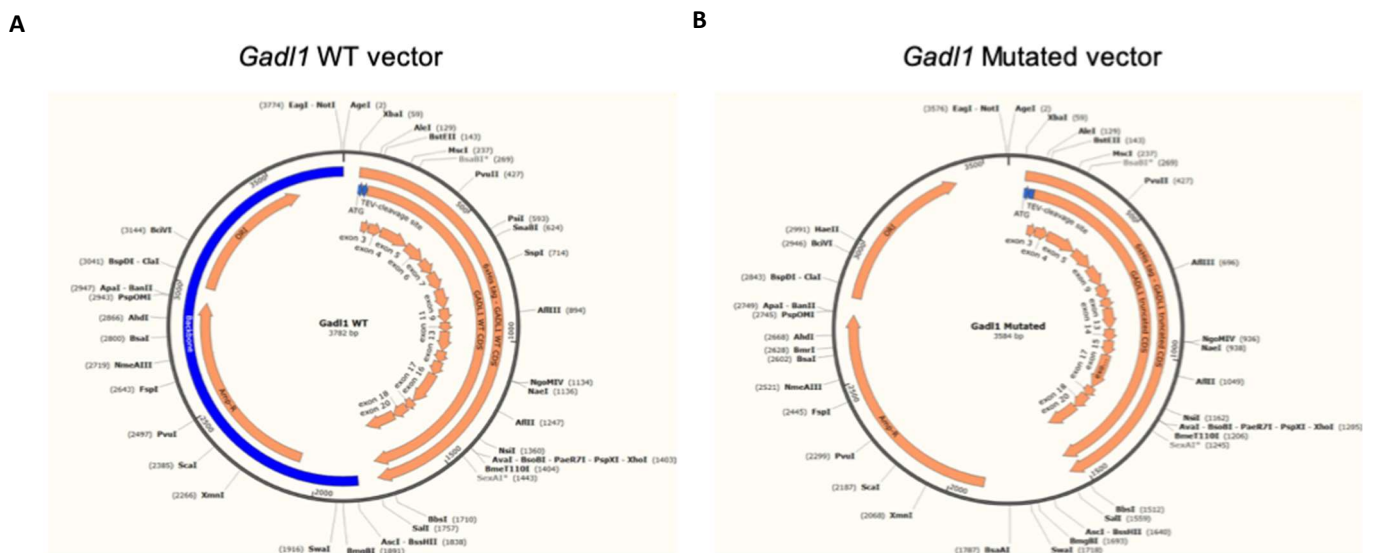

**Fig. S2. Vectors designed for *Gad1* wild type (WT) (A) and mutated (B). The vectors were made in BL21 E-coli. The proteins were expressed and purified using Histidine-tag. Created using SnapGene (v4.2, GSL Biotech).**

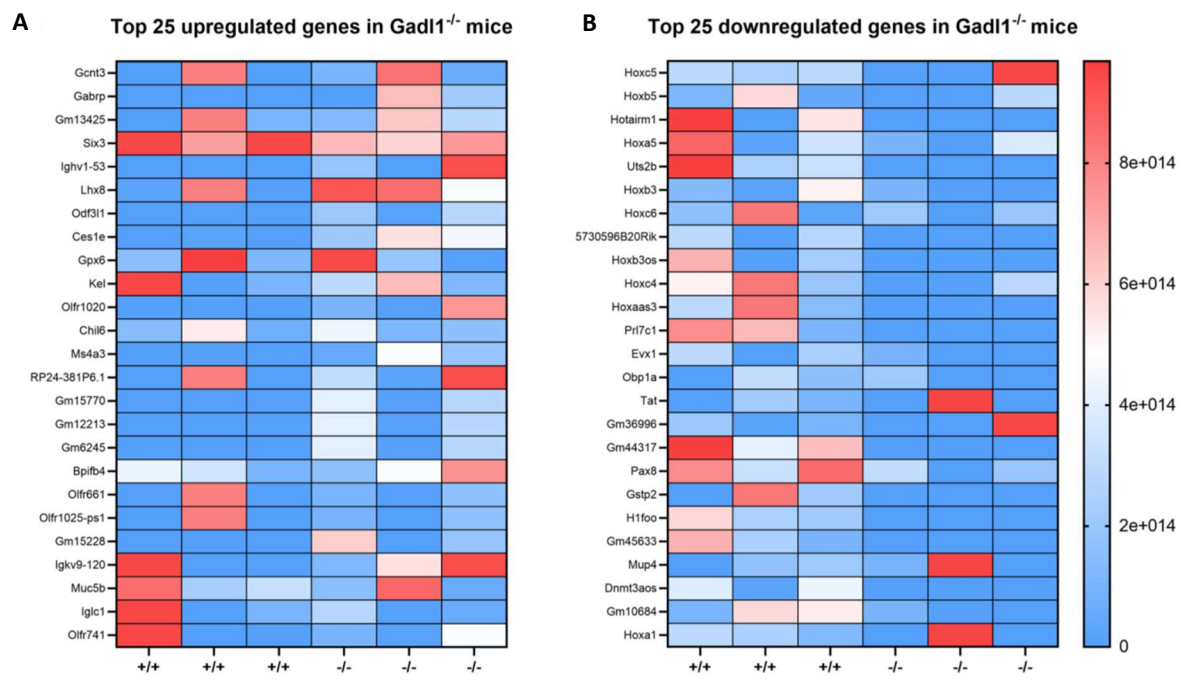

**Fig. S3. Top 25 up (A) and down (B) regulated genes in olfactory bulb when comparing *Gad1*<sup>-/-</sup> (n =3) to *Gad1*<sup>+/+</sup> (n = 3).**

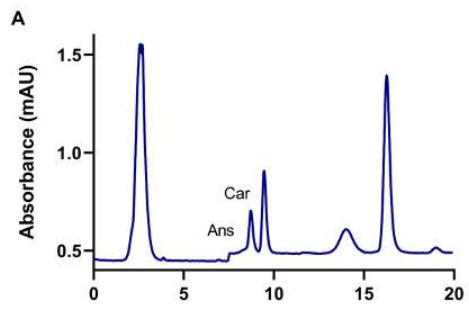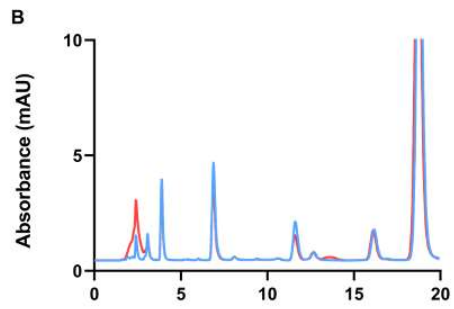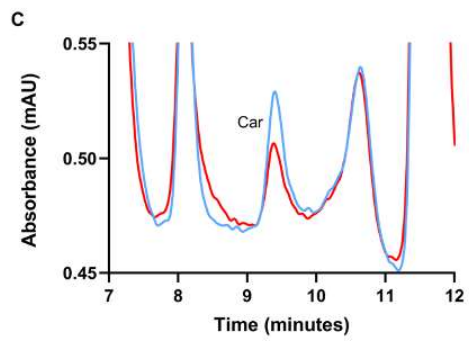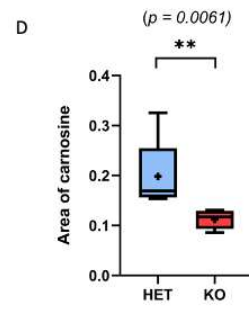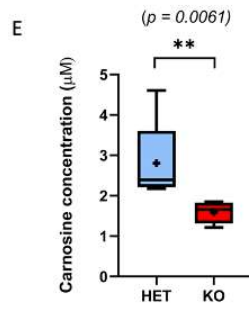

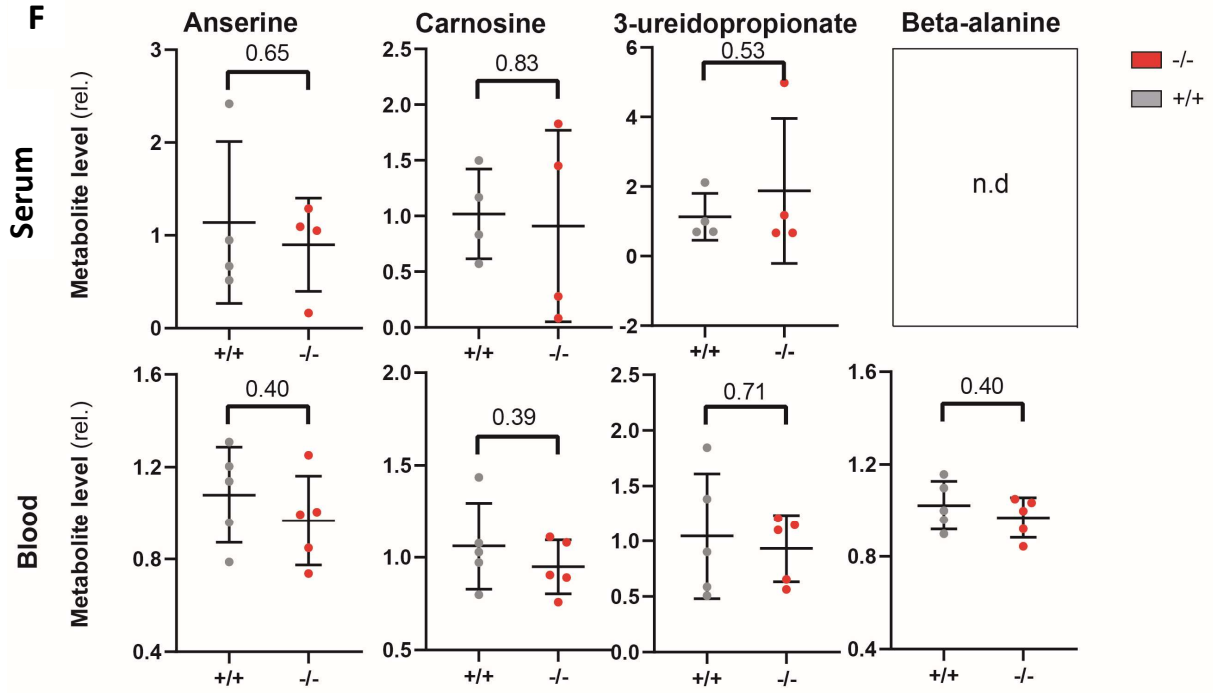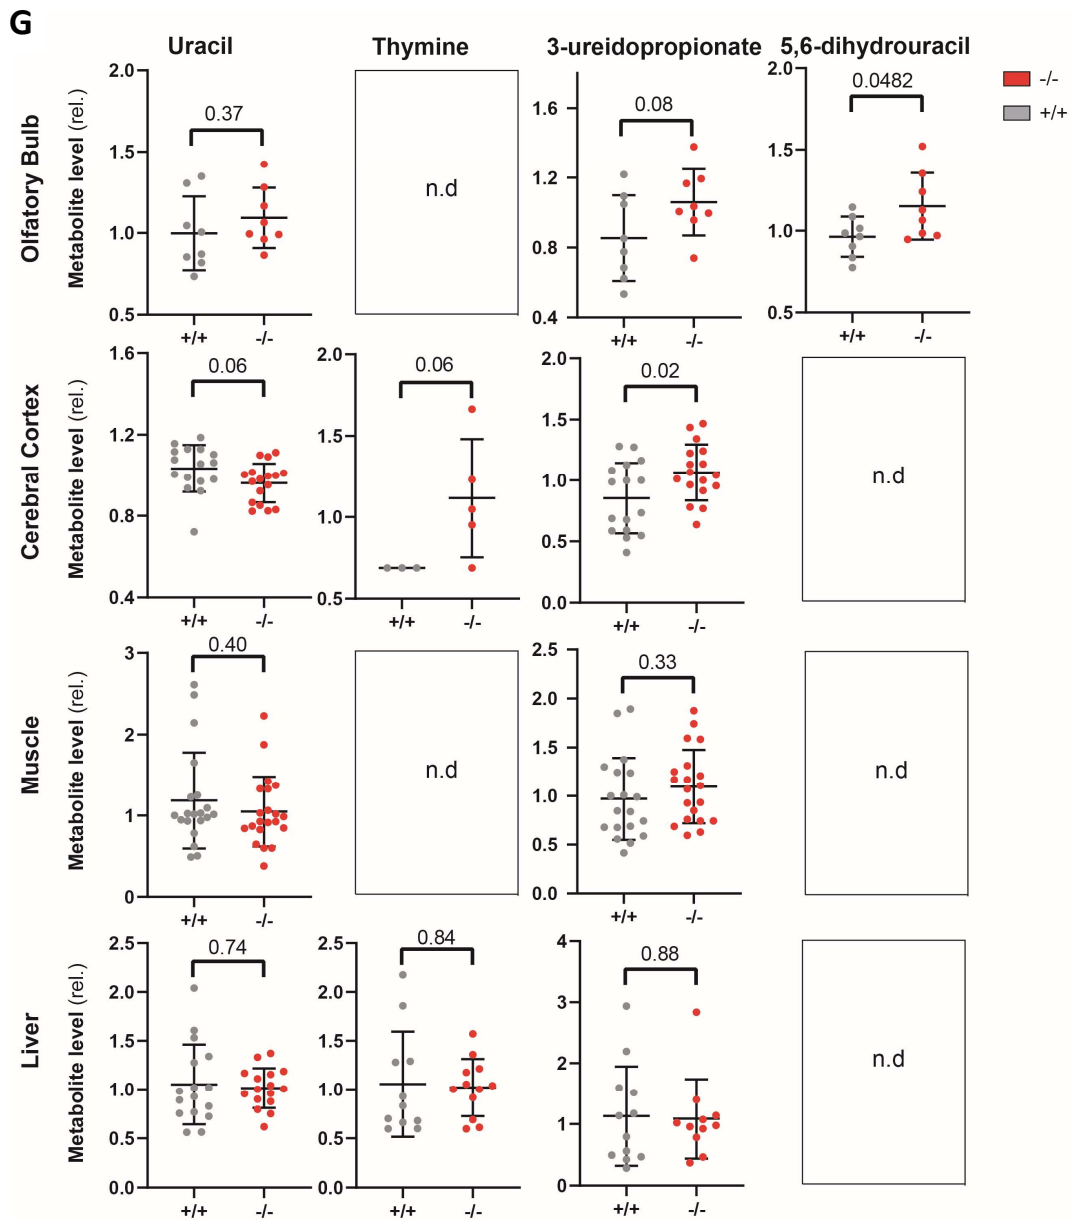



**I**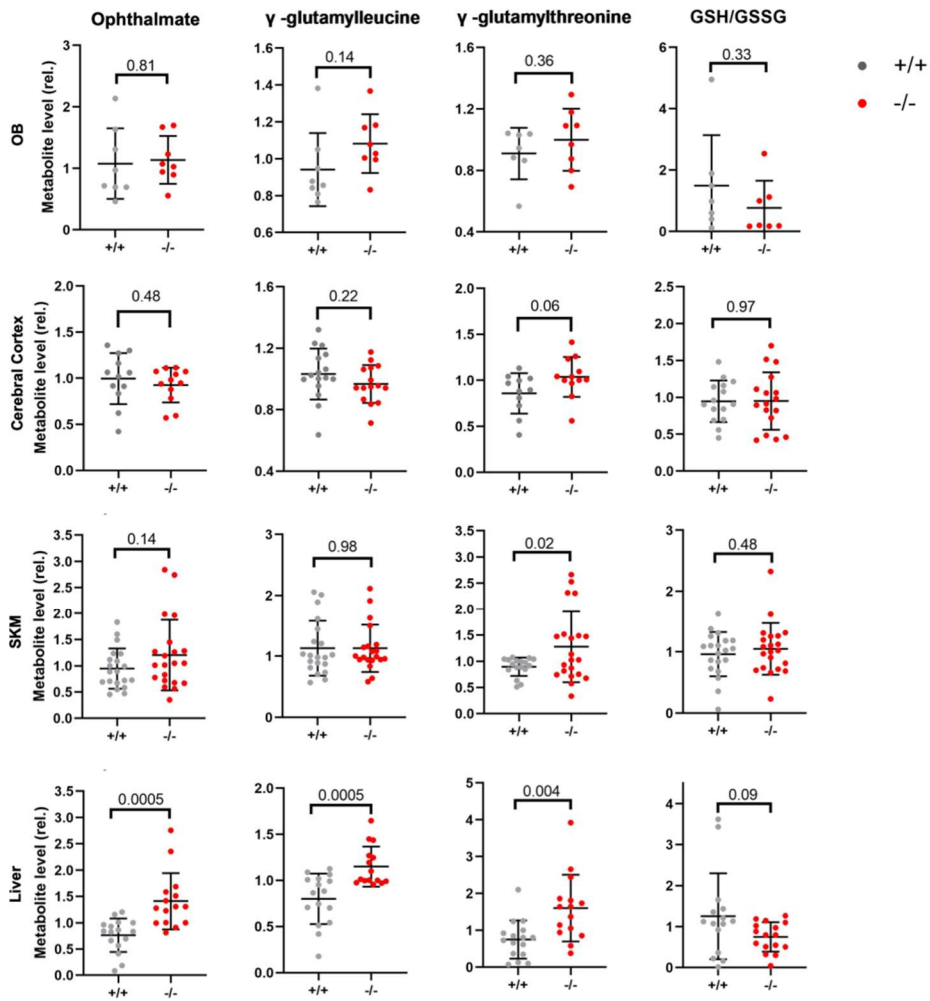**J**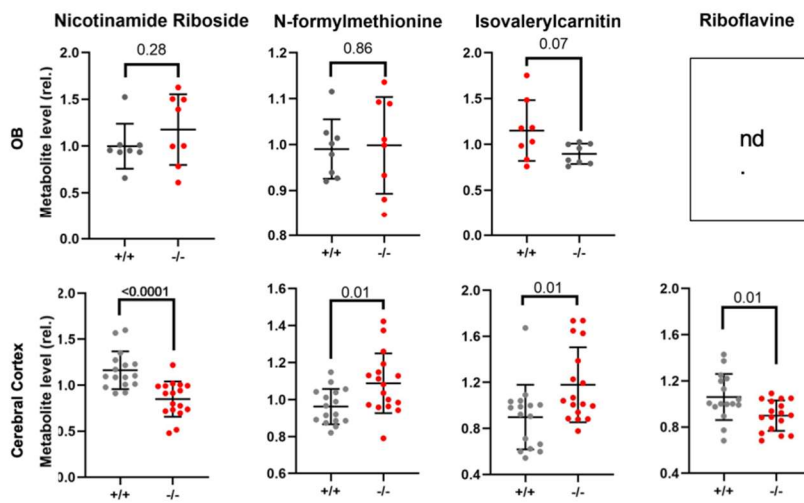

K

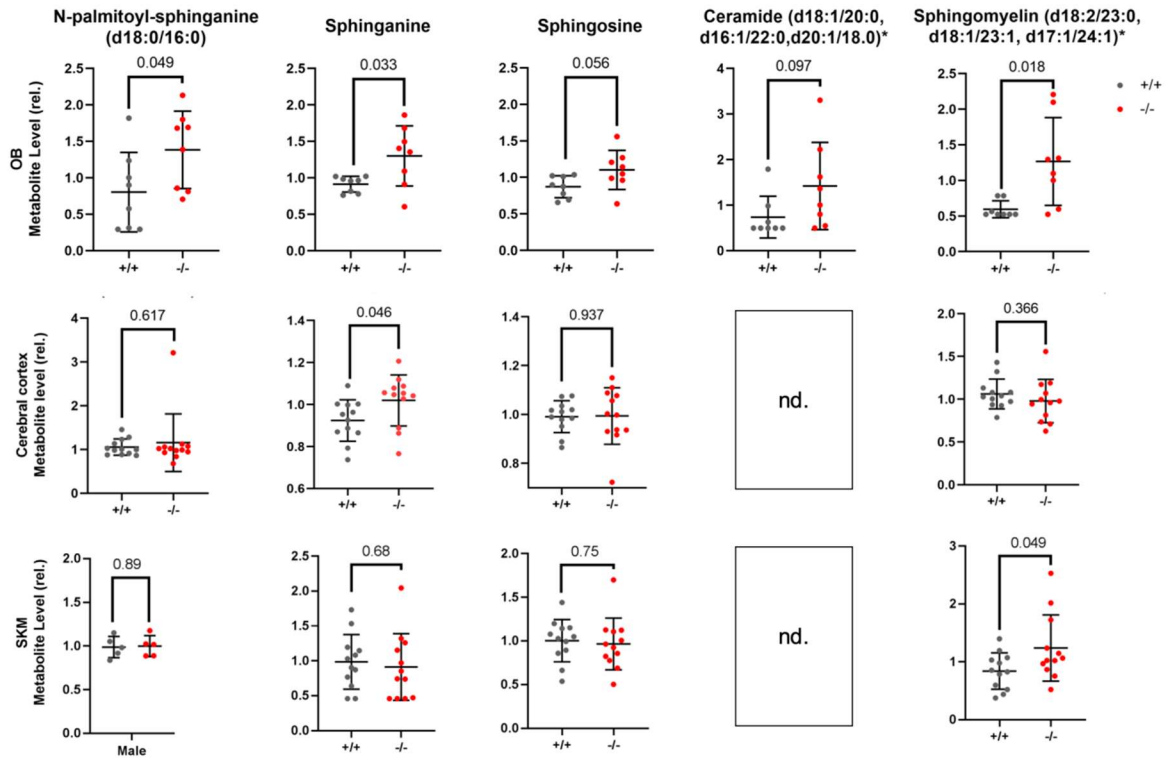

**Fig. S4. Metabolite levels in mouse tissues.** (A, B, C, D and E) Measurements of carnosine peptides in extracts of cerebral cortex from female *Gad11*<sup>+/-</sup> (n=5) and *Gad11*<sup>-/-</sup> (n=5) mice (18-22 weeks) using an isocratic RP-HPLC system. Injection of 20 $\mu$ l (A) L-anserine nitrate salt and L-carnosine, and (B and C) cerebral cortex lysates from female *Gad11*<sup>+/-</sup> (n=5) and *Gad11*<sup>-/-</sup> (n=5) mice (18-22 weeks). The box plots show (D) mean area and (E) relative level of carnosine concentration in cortex extracts. The decrease in carnosine levels was  $40.46 \pm 12.18$  % from *Gad11*<sup>+/-</sup> to *Gad11*<sup>-/-</sup>. Median is presented as a line and mean as a plus (+) sign. Whiskers are drawn from min to max value. Statistical significance ( $p < 0.05$ ) was determined with a ratio, paired t-test and significant differences are indicated with an asterisk (\*). Relative levels of (F) 3-ureido-propionate,  $\beta$ -alanine, anserine, and carnosine in whole blood and serum (n=5). Relative levels of various metabolites in OB, cerebral cortex, SKM, and liver tissue extracts from *Gad11*<sup>+/+</sup> (grey) and *Gad11*<sup>-/-</sup> (red) mice (n=5-21); (G) uracil and thymine derivatives, (H) taurine and taurine derivatives, (I) Glutamate peptides and related oxidative stress markers, (J) Nicotinamide riboside, N-formylmethionine, isovalerylcarnitine, riboflavin, (K) sphingolipids and ceramide.



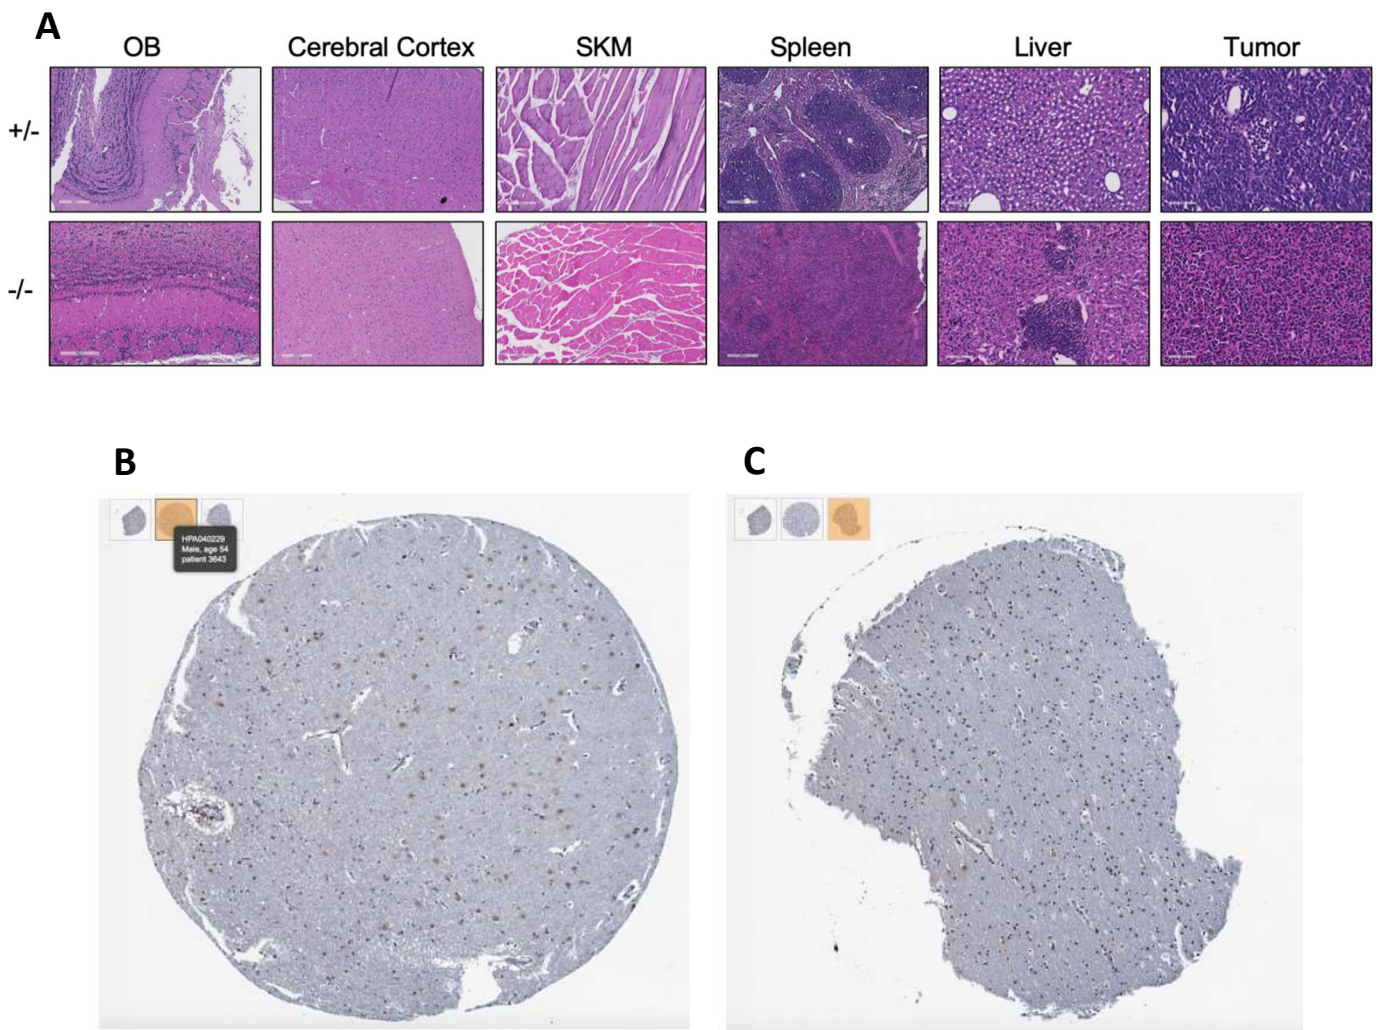

**Fig. S5. Tissue distribution of GADL1** (A) Hematoxylin and Eosin (HE) staining of mouse *Gad11*<sup>+/-</sup> and *Gad11*<sup>-/-</sup> OB, cerebral cortex, SKM, spleen, liver and tumor. (B-C) Immunohistochemistry for GADL1 of (B) grey and (C) white matter using commercial antibody adapted from Human Protein Atlas.

**Links to databases:**

Human Protein Atlas

<https://www.proteinatlas.org/ENSG00000144644-GADL1/tissue>

alliance of genome resources

<http://www.informatics.jax.org/marker/MGI:1920998>





## REFERENCES AND NOTES

1. A. A. Boldyrev, G. Aldini, W. Derave, Physiology and pathophysiology of carnosine. *Physiol. Rev.* **93**, 1803–1845 (2013).
2. R. Chaleckis, I. Murakami, J. Takada, H. Kondoh, M. Yanagida, Individual variability in human blood metabolites identifies age-related differences. *Proc. Natl. Acad. Sci. U.S.A.* **113**, 4252–4259 (2016).
3. A. R. Hipkiss, Is carnosine a naturally occurring suppressor of oxidative damage in olfactory neurones? *Rejuvenation Res.* **7**, 253–255 (2004).
4. T. L. Perry, S. Hansen, B. Tischler, R. Bunting, K. Berry, Carnosinemia — A new metabolic disorder associated with neurologic disease and mental defect. *N. Engl. J. Med.* **277**, 1219–1227 (1967).
5. K. Wisniewski, L. Fleisher, D. Rassin, H. Lassmann, Neurological disease in a child with carnosinase deficiency. *Neuropediatrics* **12**, 143–151 (1981).
6. J. H. Cararo, E. L. Streck, P. F. Schuck, G. da C Ferreira, Carnosine and related peptides: Therapeutic potential in age-related disorders. *Aging Dis.* **6**, 369–379 (2015).
7. R. M. Hobson, B. Saunders, G. Ball, R. C. Harris, C. Sale, Effects of  $\beta$ -alanine supplementation on exercise performance: A meta-analysis. *Amino Acids* **43**, 25–37 (2012).
8. A. E. Smith, A. A. Walter, J. L. Graef, K. L. Kendall, J. R. Moon, C. M. Lockwood, D. H. Fukuda, T. W. Beck, J. T. Cramer, J. R. Stout, Effects of  $\beta$ -alanine supplementation and high-intensity interval training on endurance performance and body composition in men; a double-blind trial. *J. Int. Soc. Sports Nutr.* **6**, 5 (2009).
9. B. Saunders, K. Elliott-Sale, G. G. Artioli, P. A. Swinton, E. Dolan, H. Roschel, C. Sale, B. Gualano,  $\beta$ -alanine supplementation to improve exercise capacity and performance: A systematic review and meta-analysis. *Br. J. Sports Med.* **51**, 658–669 (2016).
10. M. G. Chez, C. P. Buchanan, M. C. Aimonovitch, M. Becker, K. Schaefer, C. Black, J. Komen, Double-blind, placebo-controlled study of L-carnosine supplementation in children with autistic spectrum disorders. *J. Child Neurol.* **17**, 833–837 (2002).
11. T. Murakami, M. Furuse, The impact of taurine- and beta-alanine-supplemented diets on behavioral and neurochemical parameters in mice: Antidepressant versus anxiolytic-like effects. *Amino Acids* **39**, 427–434 (2010).

12. M. Schön, A. Mousa, M. Berk, W. L. Chia, J. Ukropec, A. Majid, B. Ukropcová, B. de Courten, The potential of carnosine in brain-related disorders: A comprehensive review of current evidence. *Nutrients* **11**, 1196 (2019).
13. G. G. Artioli, B. Gualano, A. Smith, J. Stout, A. H. Lanch Jr., Role of  $\beta$ -alanine supplementation on muscle carnosine and exercise performance. *Med. Sci. Sports Exerc.* **42**, 1162–1173 (2010).
14. E. J. Anderson, G. Vistoli, L. A. Katunga, K. Funai, L. Regazzoni, T. Blake Monroe, E. Gilardoni, L. Cannizzaro, M. Colzani, D. De Maddis, G. Rossoni, R. Canevotti, S. Gagliardi, M. Carini, G. Aldini, A carnosine analog mitigates metabolic disorders of obesity by reducing carbonyl stress. *J. Clin. Invest.* **128**, 5280–5293 (2018).
15. M. Dunnett, R. C. Harris, Influence of oral  $\beta$ -alanine and L-histidine supplementation on the carnosine content of the *gluteus medius*. *Equine Vet. J. Suppl.* **30**, 499–504 (1999).
16. E. P. Rhee, J. E. Ho, M.-H. Chen, D. Shen, S. Cheng, M. G. Larson, A. Ghorbani, X. Shi, I. T. Helenius, C. J. O'Donnell, A. L. Souza, A. Deik, K. A. Pierce, K. Bullock, G. A. Walford, R. S. Vasan, J. C. Florez, C. Clish, J.-R. J. Yeh, T. J. Wang, R. E. Gerszten, A genome-wide association study of the human metabolome in a community-based cohort. *Cell Metab.* **18**, 130–143 (2013).
17. R. Zrenner, H. Riegler, C. R. Marquard, P. R. Lange, C. Geserick, C. E. Bartosz, C. T. Chen, R. D. Slocum, A functional analysis of the pyrimidine catabolic pathway in *Arabidopsis*. *New Phytol.* **183**, 117–132 (2009).
18. F. Schmitzberger, M. L. Kilkenny, C. M. C. Lobley, M. E. Webb, M. Vinkovic, D. Matak-Vinkovic, M. Witty, D. Y. Chirgadze, A. G. Smith, C. Abell, T. L. Blundell, Structural constraints on protein self-processing in L-aspartate- $\alpha$ -decarboxylase. *EMBO J.* **22**, 6193–204 (2003).
19. S. Chopra, H. Pai, A. Ranganathan, Expression, purification, and biochemical characterization of *Mycobacterium tuberculosis* aspartate decarboxylase, PanD. *Protein Expr. Purif.* **25**, 533–540 (2002).
20. S. Suidasari, J. Stautemas, S. Uragami, N. Yanaka, W. Derave, N. Kato, Carnosine content in skeletal muscle is dependent on vitamin B6 status in rats. *Front. Nutr.* **2**, 39 (2015).
21. C.-H. Chen, C.-S. Lee, M.-T. M. Lee, W.-C. Ouyang, C.-C. Chen, M.-Y. Chong, J.-Y. Wu, H. K.-L. Tan, Y.-C. Lee, L.-J. Chuo, N.-Y. Chiu, H.-Y. Tsang, T.-J. Chang, F.-W. Lung, C.-

- H. Chiu, C.-H. Chang, Y.-S. Chen, Y.-M. Hou, C.-C. Chen, T.-J. Lai, C.-L. Tung, C.-Y. Chen, H.-Y. Lane, T.-P. Su, J. Feng, J.-J. Lin, C.-J. Chang, P.-R. Teng, C.-Y. Liu, C.-K. Chen, I.-C. Liu, J.-J. Chen, T. Lu, C.-C. Fan, C.-K. Wu, C.-F. Li, K. H.-T. Wang, L. S.-H. Wu, H.-L. Peng, C.-P. Chang, L.-S. Lu, Y.-T. Chen, A. T.-A. Cheng; Taiwan Bipolar Consortium, Variant GADL1 and response to lithium therapy in bipolar I disorder. *N. Engl. J. Med.* **370**, 119–128 (2014).
22. C. Cruceanu, M. Alda, P. A. Dion, G. Turecki, G. A. Rouleau, No evidence for *GADL1* variation as a bipolar disorder susceptibility factor in a Caucasian lithium-responsive cohort. *Am. J. Psychiatry* **172**, 94–95 (2015).
23. P. Liu, X. Ge, H. Ding, H. Jiang, B. M. Christensen, J. Li, Role of glutamate decarboxylase-like protein 1 (GADL1) in taurine biosynthesis. *J. Biol. Chem.* **287**, 40898–40906 (2012).
24. I. Winge, K. Teigen, A. Fossbakk, E. Mahootchi, R. Kleppe, F. Skoldberg, O. Kämpe, J. Haavik, Mammalian CSAD and GADL1 have distinct biochemical properties and patterns of brain expression. *Neurochem. Int.* **90**, 173–184 (2015).
25. A. Raasakka, E. Mahootchi, I. Winge, W. Luan, P. Kursula, J. Haavik, Structure of the mouse acidic amino acid decarboxylase GADL1. *Acta Crystallogr. F. Struct. Biol. Commun.* **74** (Pt 1), 65–73 (2018).
26. S.-Y. Shin, E. B. Fauman, A.-K. Petersen, J. Krumsiek, R. Santos, J. Huang, M. Arnold, I. Erte, V. Forgetta, T.-P. Yang, K. Walter, C. Menni, L. Chen, L. Vasquez, A. M. Valdes, C. L. Hyde, V. Wang, D. Ziemek, P. Roberts, L. Xi, E. Grundberg; The Multiple Tissue Human Expression Resource (Mu THER) Consortium, M. Waldenberger, J. B. Richards, R. P. Mohny, M. V. Milburn, S. L. John, J. Trimmer, F. J. Theis, J. P. Overington, K. Suhre, M. J. Brosnan, C. Gieger, G. Kastenmüller, T. D. Spector, N. Soranzo, An atlas of genetic influences on human blood metabolites. *Nat. Genet.* **46**, 543–550 (2014).
27. M. Kanehisa, S. Goto, KEGG: Kyoto encyclopedia of genes and genomes. *Nucleic Acids Res.* **28**, 27–30 (2000).
28. The Gene Ontology Consortium, Gene Ontology Consortium: Going forward. *Nucleic Acids Res.* **43** (Database issue), D1049–D1056 (2015).
29. R. M. Kream, F. L. Margolis, Olfactory marker protein: Turnover and transport in normal and regenerating neurons. *J. Neurosci.* **4**, 868–879 (1984).

30. T.-N. Wu, C.-K. Chen, C.-S. Lee, B.-J. Wu, H.-J. Sun, C.-H. Chang, C.-Y. Chen, L. S.-H. Wu, A. T.-A. Cheng, Lithium and GADL1 regulate glycogen synthase kinase-3 activity to modulate *KCTD12* expression. *Sci. Rep.* **9**, 10255 (2019).
31. R. Percudani, A. Peracchi, A genomic overview of pyridoxal-phosphate-dependent enzymes. *EMBO Rep.* **4**, 850–854 (2003).
32. G. Fenalti, R. H. P. Law, A. M. Buckle, C. Langendorf, K. Tuck, C. J. Rosado, N. G. Faux, K. Mahmood, C. S. Hampe, J. P. Banga, M. Wilce, J. Schmidberger, J. Rossjohn, O. El-Kabbani, R. N. Pike, A. I. Smith, I. R. Mackay, M. J. Rowley, J. C. Whisstock, GABA production by glutamic acid decarboxylase is regulated by a dynamic catalytic loop. *Nat. Struct. Mol. Biol.* **14**, 280–286 (2007).
33. E. Park, S. Y. Park, C. Dobkin, G. Schuller-Levis, Development of a novel cysteine sulfinic acid decarboxylase knockout mouse: Dietary taurine reduces neonatal mortality. *J. Amino Acids* **2014**, 346809 (2014).
34. J. E. Dominy Jr., C. R. Simmons, L. L. Hirschberger, J. Hwang, R. M. Coloso, M. H. Stipanuk, Discovery and characterization of a second mammalian thiol dioxygenase, cysteamine dioxygenase. *J. Biol. Chem.* **282**, 25189–25198 (2007).
35. A. A. Boldyrev, Carnosine: New concept for the function of an old molecule. *Biochemistry (Mosc.)* **77**, 313–326 (2012).
36. M. N. Nikolova-Karakashian, M. B. Reid, Sphingolipid metabolism, oxidant signaling, and contractile function of skeletal muscle. *Antioxid. Redox Signal.* **15**, 2501–2517 (2011).
37. T. D. Wade, S. Gordon, S. Medland, C. M. Bulik, A. C. Heath, G. W. Montgomery, N. G. Martin, Genetic variants associated with disordered eating. *Int. J. Eat. Disord.* **46**, 594–608 (2013).
38. M. Wuttke, Y. Li, M. Li, K. B. Sieber, M. F. Feitosa, M. Gorski, A. Tin, L. Wang, A. Y. Chu, A. Hoppmann, H. Kirsten, A. Giri, J.-F. Chai, G. Sveinbjornsson, B. O. Tayo, T. Nutile, C. Fuchsberger, J. Marten, M. Cocca, S. Ghasemi, Y. Xu, K. Horn, D. Noce, P. J. van der Most, S. Sedaghat, Z. Yu, M. Akiyama, S. Afaq, T. S. Ahluwalia, P. Almgren, N. Amin, J. Ärnlöv, S. J. L. Bakker, N. Bansal, D. Baptista, S. Bergmann, M. L. Biggs, G. Biino, M. Boehnke, E. Boerwinkle, M. Boissel, E. P. Bottinger, T. S. Boutin, H. Brenner, M. Brumat, R. Burkhardt, A. S. Butterworth, E. Campana, A. Campbell, H. Campbell, M. Canouil, R. J. Carroll, E. Catamo, J. C. Chambers, M.-L. Chee, M.-L. Chee, X. Chen, C.-Y. Cheng, Y.

Cheng, K. Christensen, R. Cifkova, M. Ciullo, M. P. Concas, J. P. Cook, J. Coresh, T. Corre, C. F. Sala, D. Cusi, J. Danesh, E. W. Daw, M. H. de Borst, A. De Grandi, R. de Mutsert, A. P. J. de Vries, F. Degenhardt, G. Delgado, A. Demirkan, E. D. Angelantonio, K. Dittrich, J. Divers, R. Dorajoo, K.-U. Eckardt, G. Ehret, P. Elliott, K. Endlich, M. K. Evans, J. F. Felix, V. H. X. Foo, O. H. Franco, A. Franke, B. I. Freedman, S. Freitag-Wolf, Y. Friedlander, P. Froguel, R. T. Gansevoort, H. Gao, P. Gasparini, J. M. Gaziano, V. Giedraitis, C. Gieger, G. Giroto, F. Giulianini, M. Gögele, S. D. Gordon, D. F. Gudbjartsson, V. Gudnason, T. Haller, P. Hamet, T. B. Harris, C. A. Hartman, C. Hayward, J. N. Hellwege, C.-K. Heng, A. A. Hicks, E. Hofer, W. Huang, N. Hutri-Kähönen, S.-J. Hwang, M. A. Ikram, O. S. Indridason, E. Ingelsson, M. Ising, V. W. V. Jaddoe, J. Jakobsdottir, J. B. Jonas, P. K. Joshi, N. S. Josyula, B. Jung, M. Kähönen, Y. Kamatani, C. M. Kammerer, M. Kanai, M. Kastarinen, S. M. Kerr, C.-C. Khor, W. Kiess, M. E. Kleber, W. Koenig, J. S. Kooner, A. Körner, P. Kovacs, A. T. Kraja, A. Krajcoviechova, H. Kramer, B. K. Krämer, F. Kronenberg, M. Kubo, B. Kühnel, M. Kuokkanen, J. Kuusisto, M. L. Bianca, M. Laakso, L. A. Lange, C. D. Langefeld, J. J.-M. Lee, B. Lehne, T. Lehtimäki, W. Lieb, L. C. Study, S.-C. Lim, L. Lind, C. M. Lindgren, J. Liu, J. Liu, M. Loeffler, R. J. F. Loos, S. Lucae, M. A. Lukas, L.-P. Lyytikäinen, R. Mägi, P. K. E. Magnusson, A. Mahajan, N. G. Martin, J. Martins, W. März, D. Mascalzoni, K. Matsuda, C. Meisinger, T. Meitinger, O. Melander, A. Metspalu, E. K. Mikaelisdottir, Y. Milaneschi, K. Miliku, P. P. Mishra; V. A. Million Veteran Program, K. L. Mohlke, N. Mononen, G. W. Montgomery, D. O. Mook-Kanamori, J. C. Mychaleckyj, G. N. Nadkarni, M. A. Nalls, M. Nauck, K. Nikus, B. Ning, I. M. Nolte, R. Noordam, J. O'Connell, M. L. O'Donoghue, I. Olafsson, A. J. Oldehinkel, M. Orho-Melander, W. H. Ouwehand, S. Padmanabhan, N. D. Palmer, R. Palsson, B. W. J. H. Penninx, T. Perls, M. Perola, M. Pirastu, N. Pirastu, G. Pistis, A. I. Podgornaia, O. Polasek, B. Ponte, D. J. Porteous, T. Poulain, P. P. Pramstaller, M. H. Preuss, B. P. Prins, M. A. Province, T. J. Rabelink, L. M. Raffield, O. T. Raitakari, D. F. Reilly, R. Rettig, M. Rheinberger, K. M. Rice, P. M. Ridker, F. Rivadeneira, F. Rizzi, D. J. Roberts, A. Robino, P. Rossing, I. Rudan, R. Rueedi, D. Ruggiero, K. A. Ryan, Y. Saba, C. Sabanayagam, V. Salomaa, E. Salvi, K.-U. Saum, H. Schmidt, R. Schmidt, B. Schöttker, C.-A. Schulz, N. Schupf, C. M. Shaffer, Y. Shi, A. V. Smith, B. H. Smith, N. Soranzo, C. N. Spracklen, K. Strauch, H. M. Stringham, M. Stumvoll, P. O. Svensson, S. Szymczak, E.-S. Tai, S. M. Tajuddin, N. Y. Q. Tan, K. D. Taylor, A.

- Teren, Y.-C. Tham, J. Thiery, C. H. L. Thio, H. Thomsen, G. Thorleifsson, D. Toniolo, A. Tönjes, J. Tremblay, I. Tzoulaki, A. G. Uitterlinden, S. Vaccargiu, R. M. van Dam, P. van der Harst, C. M. van Duijn, D. R. Velez Edward, N. Verweij, S. Vogelesang, U. Völker, P. Vollenweider, G. Waeber, M. Waldenberger, L. Wallentin, Y. X. Wang, C. Wang, D. M. Waterworth, W. B. Wei, H. White, J. B. Whitfield, S. H. Wild, J. F. Wilson, M. K. Wojczynski, C. Wong, T.-Y. Wong, L. Xu, Q. Yang, M. Yasuda, L. M. Yerges-Armstrong, W. Zhang, A. B. Zonderman, J. I. Rotter, M. Bochud, B. M. Psaty, V. Vitart, J. G. Wilson, A. Dehghan, A. Parsa, D. I. Chasman, K. Ho, A. P. Morris, O. Devuyst, S. Akilesh, S. A. Pendergrass, X. Sim, C. A. Böger, Y. Okada, T. L. Edwards, H. Snieder, K. Stefansson, A. M. Hung, I. M. Heid, M. Scholz, A. Teumer, A. Köttgen, C. Pattaro, A catalog of genetic loci associated with kidney function from analyses of a million individuals. *Nat. Genet.* **51**, 957–972 (2019).
39. C. A. de Leeuw, J. M. Mooij, T. Heskes, D. Posthuma, MAGMA: Generalized gene-set analysis of GWAS data. *PLOS Comput. Biol.* **11**, e1004219 (2015).
40. I. Everaert, H. De Naeyer, Y. Taes, W. Derave, Gene expression of carnosine-related enzymes and transporters in skeletal muscle. *Eur. J. Appl. Physiol.* **113**, 1169–1179 (2013).
41. M. M. Matthews, T. W. Traut. Regulation of *N*-carbamoyl- $\beta$ -alanine amidohydrolase, the terminal enzyme in pyrimidine catabolism, by ligand-induced change in polymerization. *J. Biol. Chem.* **262**, 7232–7237 (1987).
42. A. Peracchi The limits of enzyme specificity and the evolution of metabolism. *Trends Biochem. Sci.* **43**, 984–996 (2018).
43. A. Shetewy, K. Shimada-Takaura, D. Warner, C. J. Jong, A.-B. Al Mehdi, M. Alexeyev, K. Takahashi, S. W. Schaffer, Mitochondrial defects associated with  $\beta$ -alanine toxicity: Relevance to hyper-beta-alaninemia. *Mol. Cell. Biochem.* **416**, 11–22 (2016).
44. T. Gemelli, R. B. de Andrade, D. B. Rojas, N. F. Bonorino, P. N. Mazzola, L. S. Tortorelli, C. Funchal, C. S. D. Filho, C. M. D. Wannmacher, Effects of  $\beta$ -alanine administration on selected parameters of oxidative stress and phosphoryltransfer network in cerebral cortex and cerebellum of rats. *Mol. Cell. Biochem.* **380**, 161–170 (2013).
5. M. A. Kamal, H. Jiang, Y. Hu, R. F. Keep, D. E. Smith, Influence of genetic knockout of *Pept2* on the in vivo disposition of endogenous and exogenous carnosine in wild-type and *Pept2* null mice. *Am. J. Physiol. Regul. Integr. Comp. Physiol.* **296**, R986–R991 (2009).

6. E. Miyamoto-Mikami, K. Tsuji, N. Horii, N. Hasegawa, S. Fujie, T. Homma, M. Uchida, T. Hamaoka, H. Kanehisa, I. Tabata, M. Iemitsu, Gene expression profile of muscle adaptation to high-intensity intermittent exercise training in young men. *Sci. Rep.* **8**, 16811 (2018).
47. J. Drozak, M. Veiga-da-Cunha, D. Vertommen, V. Stroobant, E. Van Schaftingen, Molecular identification of carnosine synthase as ATP-grasp domain-containing protein 1 (ATPGD1). *J. Biol. Chem.* **285**, 9346–9356 (2010).
48. B. Janssen, D. Hohenadel, P. Brinkkoetter, V. Peters, N. Rind, C. Fischer, I. Rychlik, M. Cerna, M. Romzova, E. de Heer, H. Baelde, S. J. L. Bakker, M. Zirie, E. Rondeau, P. Mathieson, M. A. Saleem, J. Meyer, H. Köppel, S. Sauerhoefer, C. R. Bartram, P. Nawroth, H.-P. Hammes, B. A. Yard, J. Zschocke, F. J. van der Woude, Carnosine as a protective factor in diabetic nephropathy: Association with a leucine repeat of the carnosinase gene CNDP1. *Diabetes* **54**, 2320–2327 (2005).
49. M. A. Babizhayev, Biochemical, biomedical and metabolic aspects of imidazole-containing dipeptides with the inherent complexity to neurodegenerative diseases and various states of mental well-being: A challenging correction and neurotherapeutic pharmaceutical biotechnology for treating cognitive deficits, depression and intellectual disabilities. *Curr. Pharm. Biotechnol.* **15**, 738–778 (2014).
50. J. Ivanisevic, A. A. Epstein, M. E. Kurczy, P. H. Benton, W. Uritboonthai, H. S. Fox, M. D. Boska, H. E. Gendelman, G. Siuzdak, Brain region mapping using global metabolomics. *Chem. Biol.* **21**, 1575–1584 (2014).
51. M.-C. Senut, S. Azher, F. L. Margolis, K. Patel, A. Mousa, A. Majid, Distribution of carnosine-like peptides in the nervous system of developing and adult zebrafish (*Danio rerio*) and embryonic effects of chronic carnosine exposure. *Cell Tissue Res.* **337**, 45–61 (2009).
2. N. Alenina, D. Kikic, M. Todiras, V. Mosienko, F. Qadri, R. Plehm, P. Boyé, L. Vilianovitch, R. Sohr, K. Tenner, H. Hörtnagl, M. Bader, Growth retardation and altered autonomic control in mice lacking brain serotonin. *Proc. Natl. Acad. Sci. U.S.A.* **106**, 10332–10337 (2009).
53. S. Sun, Y. Sun, S.-C. Ling, L. Ferraiuolo, M. McAlonis-Downes, Y. Zou, K. Drenner, Y. Wang, D. Ditsworth, S. Tokunaga, A. Kopelevich, B. K. Kaspar, C. Lagier-Tourenne, D. W. Cleveland, Translational profiling identifies a cascade of damage initiated in motor neurons



and spreading to glia in mutant SOD1-mediated ALS. *Proc. Natl. Acad. Sci. U.S.A.* **112**, E6993–E7002 (2015).

54. S. Schwartz, E. Hall, G. Ast, SROOGLE: Webserver for integrative, user-friendly visualization of splicing signals. *Nucleic Acids Res.* **37**, W189–W192 (2009).
55. K. J. Livak, T. D. Schmittgen, Analysis of relative gene expression data using real-time quantitative PCR and the  $2^{-\Delta\Delta C_T}$  method. *Methods* **25**, 402–408 (2001).
56. D. Kim, B. Langmead, S. L. Salzberg, HISAT: A fast spliced aligner with low memory requirements. *Nat. Methods* **12**, 357–360 (2015).
57. Y. Liao, G. K. Smyth, W. Shi, featureCounts: An efficient general purpose program for assigning sequence reads to genomic features. *Bioinformatics* **30**, 923–930 (2014).
58. M. I. Love, W. Huber, S. Anders, Moderated estimation of fold change and dispersion for RNA-seq data with DESeq2. *Genome Biol.* **15**, 550 (2014).
59. T. Metsalu, J. Vilo, ClustVis: A web tool for visualizing clustering of multivariate data using principal component analysis and heatmap. *Nucleic Acids Res.* **43** (W1), W566–W570 (2015).
0. G. Fenalti, C. S. Hampe, K. O’Connor, J. P. Banga, I. R. Mackay, M. J. Rowley, O. El-Kabbani, Molecular characterization of a disease associated conformational epitope on GAD65 recognised by a human monoclonal antibody b96.11. *Mol. Immunol.* **44**, 1178–1189 (2007).
61. P. Emsley, B. Lohkamp, W G Scott, K. Cowtan, Features and development of Coot. *Acta Crystallogr. D Biol. Crystallogr.* **66** (Pt 4), 486–501 (2010).
62. E. F. Pettersen, T. D. Goddard, C. C. Huang, G. S. Couch, D. M. Greenblatt, E. C. Meng, T. E. Ferrin, UCSF Chimera—A visualization system for exploratory research and analysis. *J. Comput. Chem.* **25**, 1605–1612 (2004).
63. C. G. Langendorf, K. L. Tuck, T. L. G. Key, G. Fenalti, R. N. Pike, C. J. Rosado, A. S. M. Wong, A. M. Buckle, R. H. P. Law, J. C. Whisstock, Structural characterization of the mechanism through which human glutamic acid decarboxylase auto-activates. *Biosci. Rep.* **33**, 137–144 (2013).
64. D. Demontis, R. K. Walters, J. Martin, M. Mattheisen, T. D. Als, E. Agerbo, G. Baldursson, R. Belliveau, J. Bybjerg-Grauholm, M. Bækvad-Hansen, F. Cerrato, K. Chambert, C. Churchhouse, A. Dumont, N. Eriksson, M. Gandal, J. I. Goldstein, K. L. Grasby, J. Grove, O.

- O. Gudmundsson, C. S. Hansen, M. E. Hauberg, M. V. Hollegaard, D. P. Howrigan, H. Huang, J. B. Maller, A. R. Martin, N. G. Martin, J. Moran, J. Pallesen, D. S. Palmer, C. B. Pedersen, M. G. Pedersen, T. Poterba, J. B. Poulsen, S. Ripke, E. B. Robinson, F. K. Satterstrom, H. Stefansson, C. Stevens, P. Turley, G. B. Walters, H. Won, M. J. Wright; ADHD Working Group of the Psychiatric Genomics Consortium (PGC); Early Lifecourse & Genetic Epidemiology (EAGLE) Consortium; 23andMe Research Team, O. A. Andreassen, P. Asherson, C. L. Burton, D. I. Boomsma, B. Cormand, S. Dalsgaard, B. Franke, J. Gelernter, D. Geschwind, H. Hakonarson, J. Haavik, H. R. Kranzler, J. Kuntsi, K. Langley, K.-P. Lesch, C. Middeldorp, A. Reif, L. A. Rohde, P. Roussos, R. Schachar, P. Sklar, E. J. S. Sonuga-Barke, P. F. Sullivan, A. Thapar, J. Y. Tung, I. D. Waldman, S. E. Medland, K. Stefansson, M. Nordentoft, D. M. Hougaard, T. Werge, O. Mors, P. B. Mortensen, M. J. Daly, S. V. Faraone, A. D. Børglum, B. M. Neale, Discovery of the first genome-wide significant risk loci for attention deficit/hyperactivity disorder. *Nat. Genet.* **51**, 63–75 (2019).
65. L. G. Fritsche, W. Igl, J. N. C. Bailey, F. Grassmann, S. Sengupta, J. L. Bragg-Gresham, K. P. Burdon, S. J. Hebring, C. Wen, M. Gorski, I. K. Kim, D. Cho, D. Zack, E. Souied, H. P. N. Scholl, E. Bala, K. E. Lee, D. J. Hunter, R. J. Sardell, P. Mitchell, J. E. Merriam, V. Cipriani, J. D. Hoffman, T. Schick, Y. T. E. Lechanteur, R. H. Guymer, M. P. Johnson, Y. Jiang, C. M. Stanton, G. H. S. Buitendijk, X. Zhan, A. M. Kwong, A. Boleda, M. Brooks, L. Gieser, R. Ratnapriya, K. E. Branham, J. R. Foerster, J. R. Heckenlively, M. I. Othman, B. J. Vote, H. H. Liang, E. Souzeau, I. L. McAllister, T. Isaacs, J. Hall, S. Lake, D. A. Mackey, I. J. Constable, J. E. Craig, T. E. Kitchner, Z. Yang, Z. Su, H. Luo, D. Chen, H. Ouyang, K. Flagg, D. Lin, G. Mao, H. Ferreyra, K. Stark, C. N von Strachwitz, A. Wolf, C. Brandl, G. Rudolph, M. Olden, M. A. Morrison, D. J. Morgan, M. Schu, J. Ahn, G. Silvestri, E. E. Tsironi, K. H. Park, L. A. Farrer, A. Orlin, A. Brucker, M. Li, C. A. Curcio, S. Mohand-Saïd, J.-A. Sahel, I. Audo, M. Benchaboune, A. J. Cree, C. A. Rennie, S. V. Goverdhan, M. Grunin, S. Hagbi-Levi, P. Campochiaro, N. Katsanis, F. G. Holz, F. Blond, H. Blanché, J.-F. Deleuze, R. P. Igo Jr., B. Truitt, N. S. Peachey, S. M. Meuer, C. E. Myers, E. L. Moore, R. Klein, M. A. Hauser, E. A. Postel, M. D. Courtenay, S. G. Schwartz, J. L. Kovach, W. K. Scott, G. Liew, A. G. Tan, B. Gopinath, J. C. Merriam, R. T. Smith, J. C. Khan, H. Shahid, A. T. Moore, J. A. McGrath, R. Laux, M. A. Brantley Jr., A. Agarwal, L. Ersoy, A. Caramoy, T. Langmann, N. T. M. Saksens, E. K. de Jong, C. B. Hoyng, M. S. Cain, A. J. Richardson,

- T. M. Martin, J. Blangero, D. E. Weeks, B. Dhillon, C. M van Duijn, K. F. Doheny, J. Romm, C. C. W. Klaver, C. Hayward, M. B. Gorin, M. L. Klein, P. N. Baird, A. I den Hollander, S. Fauser, J. R. W. Yates, R. Allikmets, J. J. Wang, D. A. Schaumberg, B. E. K. Klein, S. A. Hagstrom, I. Chowers, A. J. Lotery, T. Léveillard, K. Zhang, M. H. Brilliant, A. W. Hewitt, A. Swaroop, E. Y. Chew, M. A. Pericak-Vance, M. De Angelis, D. Stambolian, J. L. Haines, S. K. Iyengar, B. H. F. Weber, G. R. Abecasis, I. M. Heid, A large genome-wide association study of age-related macular degeneration highlights contributions of rare and common variants. *Nat. Genet.* **48**, 134–143 (2016).
66. J. Grove, S. Ripke, T. D. Als, M. Mattheisen, R. K. Walters, H. Won, J. Pallesen, E. Agerbo, O. A. Andreassen, R. Anney, S. Awashti, R. Belliveau, F. Bettella, J. D. Buxbaum, J. Bybjerg-Grauholm, M. Bækvad-Hansen, F. Cerrato, K. Chambert, J. H. Christensen, C. Churchhouse, K. Dellenvall, D. Demontis, S. De Rubeis, B. Devlin, S. Djurovic, A. L. Dumont, J. I. Goldstein, C. S. Hansen, M. E. Hauberg, M. V. Hollegaard, S. Hope, D. P. Howrigan, H. Huang, C. M. Hultman, L. Klei, J. Maller, J. Martin, A. R. Martin, J. L. Moran, M. Nyegaard, T. Nærland, D. S. Palmer, A. Palotie, C. B. Pedersen, M. G. Pedersen, T. dPoterba, J. B. Poulsen, B. S. Pourcain, P. Qvist, K. Rehnström, A. Reichenberg, J. Reichert, E. B. Robinson, K. Roeder, P. Roussos, E. Saemundsen, S. Sandin, F. K. Satterstrom, G. D. Smith, H. Stefansson, S. Steinberg, C. R. Stevens, P. F. Sullivan, P. Turley, G. B. Walters, X. Xu; Autism Spectrum Disorder Working Group of the Psychiatric Genomics Consortium; BUPGEN; Major Depressive Disorder Working Group of the Psychiatric Genomics Consortium; 23andMe Research Team, K. Stefansson, D. H. Geschwind, M. Nordentoft, D. M. Hougaard, T. Werge, O. Mors, P. B. Mortensen, B. M. Neale, M. J. Daly, A. D. Børglum, Identification of common genetic risk variants for autism spectrum disorder. *Nat. Genet.* **51**, 431–444 (2019).
67. I. E. Jansen, J. E. Savage, K. Watanabe, J. Bryois, D. M. Williams, S. Steinberg, J. Sealock, I. K. Karlsson, S. Hägg, L. Athanasiu, N. Voyle, P. Proitsi, A. Witoelar, S. Stringer, D. Aarsland, I. S. Almdahl, F. Andersen, S. Bergh, F. Bettella, S. Bjornsson, A. Brækhus, G. Bråthen, C. de Leeuw, R. S. Desikan, S. Djurovic, L. Dumitrescu, T. Fladby, T. J. Hohman, P. V. Jonsson, S. J. Kiddle, A. Rongve, I. Saltvedt, S. B. Sando, G. Selbæk, M. Shoai, N. G. Skene, J. Snaedal, E. Stordal, I. D. Ulstein, Y. Wang, L. R. White, J. Hardy, J. Hjerling-Leffler, P. F. Sullivan, W. M. van der Flier, R. Dobson, L. K. Davis, H. Stefansson, K.

- Stefansson, N. L. Pedersen, S. Ripke, O. A. Andreassen, D. Posthuma, Genome-wide meta-analysis identifies new loci and functional pathways influencing Alzheimer's disease risk. *Nat. Genet.* **51**, 404–413 (2019).
68. J. J. Lee, R. Wedow, A. Okbay, E. Kong, O. Maghzian, M. Zacher, T. A. Nguyen-Viet, P. Bowers, J. Sidorenko, R. K. Linnér, M. A. Fontana, T. Kundu, C. Lee, H. Li, R. Li, R. Royer, P. N. Timshel, R. K. Walters, E. A. Willoughby, L. Yengo; 23andMe Research Team; COGENT (Cognitive Genomics Consortium); Social Science Genetic Association Consortium, M. Alver, Y. Bao, D. W. Clark, F. R. Day, N. A. Furlotte, P. K. Joshi, K. E. Kemper, A. Kleinman, C. Langenberg, R. Mägi, J. W. Trampush, S. S. Verma, Y. Wu, M. Lam, J. H. Zhao, Z. Zheng, J. D. Boardman, H. Campbell, J. Freese, K. M. Harris, C. Hayward, P. Herd, M. Kumari, T. Lencz, J. Luan, A. K. Malhotra, A. Metspalu, L. Milani, K. K. Ong, J. R. B. Perry, D. J. Porteous, M. D. Ritchie, M. C. Smart, B. H. Smith, J. Y. Tung, N. J. Wareham, J. F. Wilson, J. P. Beauchamp, D. C. Conley, T. Esko, S. F. Lehrer, P. K. E. Magnusson, S. Oskarsson, T. H. Pers, M. R. Robinson, K. Thom, C. Watson, C. F. Chabris, M. N. Meyer, D. I. Laibson, J. Yang, M. Johannesson, P. D. Koellinger, P. Turley, P. M. Visscher, D. J. Benjamin, D. Cesarini, Gene discovery and polygenic prediction from a genome-wide association study of educational attainment in 1.1 million individuals. *Nat. Genet.* **50**, 1112–1121 (2018).
69. M. A. Nalls, C. Blauwendraat, C. L. Vallerga, K. Heilbron, S. Bandres-Ciga, D. Chang, M. Tan, D. A. Kia, A. J. Noyce, A. Xue, J. Bras, E. Young, R. von Coelln, J. Simón-Sánchez, C. Schulte, M. Sharma, L. Krohn, L. Pihlstrøm, A. Siitonen, H. Iwaki, H. Leonard, F. Faghri, J. R. Gibbs, D. G. Hernandez, S. W. Scholz, J. A. Botia, M. Martinez, J.-C. Corvol, S. Lesage, J. Jankovic, L. M. Shulman, M. Sutherland, P. Tienari, K. Majamaa, M. Toft, O. A. Andreassen, T. Bangale, A. Brice, J. Yang, Z. Gan-Or, T. Gasser, P. Heutink, J. M. Shulman, N. W. Wood, D. A. Hinds, J. A. Hardy, H. R. Morris, J. Gratten, P. M. Visscher, R. R. Graham, A. B. Singleton; 23andMe Research Team; System Genomics of Parkinson's Disease Consortium; International Parkinson's Disease Genomics Consortium, Identification of novel risk loci, causal insights, and heritable risk for Parkinson's disease: A meta-analysis of genome-wide association studies. *Lancet Neurol.* **18**, 1091–1102 (2019).
70. A. Nicolas, K. P. Kenna, A. E. Renton, N. Ticozzi, F. Faghri, R. Chia, J. A. Dominov, B. J. Kenna, M. A. Nalls, P. Keagle, A. M. Rivera, W. van Rheenen, N. A. Murphy, J. J. F. A. van

Vugt, J. T. Geiger, R. A. Van der Spek, H. A. Pliner, Shankaracharya, B. N. Smith, G. Marangi, S. D. Topp, Y. Abramzon, A. S. Gkazi, J. D. Eicher, A. Kenna; ITALSGEN Consortium, G. Mora, A. Calvo, L. Mazzini, N. Riva, J. Mandrioli, C. Caponnetto, S. Battistini, P. Volanti, V. L. Bella, F. L. Conforti, G. Borghero, S. Messina, I. L. Simone, F. Trojsi, F. Salvi, F. O. Logullo, S. D'Alfonso, L. Corrado, M. Capasso, L. Ferrucci; Genomic Translation for ALS Care (GTAC) Consortium, C. de Araujo Martins Moreno, S. Kamalakaran, D. B. Goldstein; ALS Sequencing Consortium, A. D. Gitler, T. Harris, R. M. Myers; NYGC ALS Consortium, H. Phatnani, R. L. Musunuri, U. S. Evani, A. Abhyankar, M. C. Zody; Answer ALS Foundation, J. Kaye, S. Finkbeiner, S. K. Wyman, A. L. Nail, L. Lima, E. Fraenkel, C. N. Svendsen, L. M. Thompson, J. E. Van Eyk, J. D. Berry, T. M. Miller, S. J. Kolb, M. Cudkowicz, E. Baxi; Clinical Research in ALS and Related Disorders for Therapeutic Development (CRe ATe) Consortium, M. Benatar, J Paul Taylor, E. Rampersaud, G. Wu, J. Wu; SLAGEN Consortium, G. Lauria, F. Verde, I. Fogh, C. Tiloca, G. P. Comi, G. Sorarù, C. Cereda; French ALS Consortium, P. Corcia, H. Laaksovirta, L. Myllykangas, L. Jansson, M. Valori, J. Ealing, H. Hamdalla, S. Rollinson, S. Pickering-Brown, R. W. Orrell, K. C. Sidle, A. Malaspina, J. Hardy, A. B. Singleton, J. O. Johnson, S. Arepalli, P. C. Sapp, D. McKenna-Yasek, M. Polak, S. Asress, S. Al-Sarraj, A. King, C. Troakes, C. Vance, J. de Bellerocche, F. Baas, A. L. M. A. Ten Asbroek, J. L. Muñoz-Blanco, D. G. Hernandez, J. Ding, J. R. Gibbs, S. W. Scholz, M. K. Floeter, R. H. Campbell, F. Landi, R. Bowser, S. M. Pulst, J. M. Ravits, Daniel J L Mac Gowan, J. Kirby, E. P. Pioro, R. Pamphlett, J. Broach, G. Gerhard, T. L. Dunckley, C. B. Brady, N. W. Kowall, J. C. Troncoso, I. L. Ber, K. Mouzat, S. Lumbroso, T. D. Heiman-Patterson, F. Kamel, L. Van Den Bosch, R. H. Baloh, T. M. Strom, T. Meitinger, A. Shatunov, K. R. Van Eijk, M. de Carvalho, M. Kooyman, B. Middelkoop, M. Moisse, R. L. Mc Laughlin, M. A. Van Es, M. Weber, K. B. Boylan, M. Van Blitterswijk, R. Rademakers, K. E. Morrison, A. N. Basak, J. S. Mora, V. E. Drory, P. J. Shaw, M. R. Turner, K. Talbot, O. Hardiman, K. L. Williams, J. A. Fifita, G. A. Nicholson, I. P. Blair, G. A. Rouleau, J. Esteban-Pérez, A. García-Redondo, A. Al-Chalabi; Project MinE ALS Sequencing Consortium, E. Rogaeva, L. Zinman, L. W. Ostrow, N. J. Maragakis, J. D. Rothstein, Z. Simmons, J. Cooper-Knock, A. Brice, S. A. Goutman, E. L. Feldman, S. B. Gibson, F. Taroni, A. Ratti, C. Gellera, P. Van Damme, W. Robberecht, P. Fratta, M. Sabatelli, C. Lunetta, A. C. Ludolph, P. M. Andersen, J. H.

Weishaupt, W. Camu, J. Q. Trojanowski, V. M. Van Deerlin, R. H. Brown Jr., L. H. van den Berg, J. H. Veldink, M. B. Harms, J. D. Glass, D. J. Stone, P. Tienari, V. Silani, A. Chiò, C. E. Shaw, B. J. Traynor, J. E. Landers, Genome-wide analyses identify KIF5A as a novel ALS gene. *Neuron* **97**, 1268–1283.e6 (2018).

71. T. Otowa, K. Hek, M. Lee, E. M. Byrne, S. S. Mirza, M. G. Nivard, T. Bigdeli, S. H. Aggen, D. Adkins, A. Wolen, A. Fanous, M. C. Keller, E. Castelao, Z. Kutalik, S. Van der Auwera, G. Homuth, M. Nauck, A. Teumer, Y. Milaneschi, J.-J. Hottenga, N. Direk, A. Hofman, A. Uitterlinden, C. L. Mulder, A. K. Henders, S. E. Medland, S. Gordon, A. C. Heath, P. A. F. Madden, M. L. Pergadia, P. J. van der Most, I. M. Nolte, F. V. A. van Oort, C. A. Hartman, A. J. Oldehinkel, M. Preisig, H. J. Grabe, C. M. Middeldorp, B. W. J. H. Penninx, D. Boomsma, N. G. Martin, G. Montgomery, B. S. Maher, E. J. van den Oord, N. R. Wray, H. Tiemeier, J. M. Hettema, Meta-analysis of genome-wide association studies of anxiety disorders. *Mol. Psychiatry* **21**, 1485 (2016).
72. E. A. Stahl, G. Breen, A. J. Forstner, A. M. Quillin, S. Ripke, V. Trubetskoy, M. Mattheisen, Y. Wang, J. R. I. Coleman, H. A. Gaspar, C. A. de Leeuw, S. Steinberg, J. M. Whitehead Pavlides, M. Trzaskowski, E. M. Byrne, T. H. Pers, P. A. Holmans, A. L. Richards, L. Abbott, E. Agerbo, H. Akil, D. Albani, N. Alliey-Rodriguez, T. D. Als, A. Anjorin, V. Antilla, S. Awasthi, J. A. Badner, M. Bækvad-Hansen, J. D. Barchas, N. Bass, M. Bauer, R. Belliveau, S. E. Bergen, C. B. Pedersen, E. Bøen, M. P. Boks, J. Boocock, M. Budde, W. Bunney, M. Burmeister, J. Bybjerg-Grauholm, W. Byerley, M. Casas, F. Cerrato, P. Cervantes, K. Chambert, A. W. Charney, D. Chen, C. Churchhouse, T.-K. Clarke, W. Coryell, D. W. Craig, C. Cruceanu, D. Curtis, P. M. Czerski, A. M. Dale, S. de Jong, F. Degenhardt, J. Del-Favero, J. R. De Paulo, S. Djurovic, A. L. Dobbyn, A. Dumont, T. Elvsåshagen, V. Escott-Price, C. C. Fan, S. B. Fischer, M. Flickinger, T. M. Foroud, L. Forty, J. Frank, C. Fraser, N. B. Freimer, L. Frisén, K. Gade, D. Gage, J. Garnham, C. Giambartolomei, M. G. Pedersen, J. Goldstein, S. D. Gordon, K. Gordon-Smith, E. K. Green, M. J. Green, T. A. Greenwood, J. Grove, W. Guan, J. Guzman-Parra, M. L. Hamshere, M. Hautzinger, U. Heilbronner, S. Herms, M. Hipolito, P. Hoffmann, D. Holland, L. Huckins, S. Jamain, J. S. Johnson, A. Juréus, R. Kandaswamy, R. Karlsson, J. L. Kennedy, S. Kittel-Schneider, J. A. Knowles, M. Kogevinas, A. C. Koller, R. Kupka, C. Lavebratt, J. Lawrence, W. B. Lawson, M. Leber, P. H. Lee, S. E. Levy, J. Z. Li, C. Liu, S. Lucae, A. Maaser, D. J.

Mac Intyre, P. B. Mahon, W. Maier, L. Martinsson, S. M. Carroll, P. M. Guffin, M. G. McInnis, J. D. Mc Kay, H. Medeiros, S. E. Medland, F. Meng, L. Milani, G. W. Montgomery, D. W. Morris, T. W. Mühleisen, N. Mullins, H. Nguyen, C. M. Nievergelt, A. N. Adolfsson, E. A. Nwulia, C. O'Donovan, L. M. Olde Loohuis, A. P. S. Ori, L. Oruc, U. Ösby, R. H. Perlis, A. Perry, A. Pfennig, J. B. Potash, S. M. Purcell, E. J. Regeer, A. Reif, C. S. Reinbold, J. P. Rice, F. Rivas, M. Rivera, P. Roussos, D. M. Ruderfer, E. Ryu, C. Sánchez-Mora, A. F. Schatzberg, W. A. Scheftner, N. J. Schork, C. S. Weickert, T. Shekhtman, P. D. Shilling, E. Sigurdsson, C. Slaney, O. B. Smeland, J. L. Sobell, C. S. Hansen, A. T. Spijker, D. S. Clair, M. Steffens, J. S. Strauss, F. Streit, J. Strohmaier, S. Szelinger, R. C. Thompson, T. E. Thorgeirsson, J. Treutlein, H. Vedder, W. Wang, S. J. Watson, T. W. Weickert, S. H. Witt, S. Xi, W. Xu, A. H. Young, P. Zandi, P. Zhang, S. Zöllner; eQTLGen Consortium; BIOS Consortium, R. Adolfsson, I. Agartz, M. Alda, L. Backlund, B. T. Baune, F. Bellivier, W. H. Berrettini, J. M. Biernacka, D. H. R. Blackwood, M. Boehnke, A. D. Børglum, A. Corvin, N. Craddock, M. J. Daly, U. Dannlowski, T. Esko, B. Etain, M. Frye, J. M. Fullerton, E. S. Gershon, M. Gill, F. Goes, M. Grigoriu-Serbanescu, J. Hauser, D. M. Hougaard, C. M. Hultman, I. Jones, L. A. Jones, R. S. Kahn, G. Kirov, M. Landén, M. Leboyer, C. M. Lewis, Q. S. Li, J. Lissowska, N. G. Martin, F. Mayoral, S. L. Mc Elroy, A. M. McIntosh, F. J. McMahon, I. Melle, A. Metspalu, P. B. Mitchell, G. Morken, O. Mors, P. B. Mortensen, B. Müller-Myhsok, R. M. Myers, B. M. Neale, V. Nimgaonkar, M. Nordentoft, M. M. Nöthen, M. C. O'Donovan, K. J. Oedegaard, M. J. Owen, S. A. Paciga, C. Pato, M. T. Pato, D. Posthuma, J. A. Ramos-Quiroga, M. Ribasés, M. Rietschel, G. A. Rouleau, M. Schalling, P. R. Schofield, T. G. Schulze, A. Serretti, J. W. Smoller, H. Stefansson, K. Stefansson, E. Stordal, P. F. Sullivan, G. Turecki, A. E. Vaaler, E. Vieta, J. B. Vincent, T. Werge, J. I. Nurnberger, N. R. Wray, A. D. Florio, H. J. Edenberg, S. Cichon, R. A. Ophoff, L. J. Scott, O. A. Andreassen, J. Kelsoe, P. Sklar; the Bipolar Disorder Working Group of the Psychiatric Genomics Consortium, Genome-wide association study identifies 30 loci associated with bipolar disorder. *Nat. Genet.* **51**, 793–803 (2019).

73. A. Teumer, A. Tin, R. Sorice, M. Gorski, N. C. Yeo, A. Y. Chu, M. Li, Y. Li, V. Mijatovic, Y.-A. Ko, D. Taliun, A. Luciani, M.-H. Chen, Q. Yang, M. C. Foster, M. Olden, L. T. Hiraki, B. O. Tayo, C. Fuchsberger, A. K. Dieffenbach, A. R. Shuldiner, A. V. Smith, A. M. Zappa,

A. Lupo, B. Kollerits, B. Ponte, B. Stengel, B. K. Krämer, B. Paulweber, B. D. Mitchell, C. Hayward, C. Helmer, C. Meisinger, C. Gieger, C. M. Shaffer, C. Müller, C. Langenberg, D. Ackermann, D. Siscovick; DCCT/EDIC, E. Boerwinkle, F. Kronenberg, G. B. Ehret, G. Homuth, G. Waeber, G. Navis, G. Gambaro, G. Malerba, G. Eiriksdottir, G. Li, H. E. Wichmann, H. Grallert, H. Wallaschofski, H. Völzke, H. Brenner, H. Kramer, I. M. Leach, I. Rudan, H. L. Hillege, J. S. Beckmann, J. C. Lambert, J. Luan, J. H. Zhao, J. Chalmers, J. Coresh, J. C. Denny, K. Butterbach, L. J. Launer, L. Ferrucci, L. Kedenko, M. Haun, M. Metzger, M. Woodward, M. J. Hoffman, M. Nauck, M. Waldenberger, M. Pruijm, M. Bochud, M. Rheinberger, N. Verweij, N. J. Wareham, N. Endlich, N. Soranzo, O. Polasek, P. van der Harst, P. P. Pramstaller, P. Vollenweider, P. S. Wild, R. T. Gansevoort, R. Rettig, R. Biffar, R. J. Carroll, R. Katz, R. J. F. Loos, S.-J. Hwang, S. Coassin, S. Bergmann, S. E. Rosas, S. Stracke, T. B. Harris, T. Corre, T. Zeller, T. Illig, T. Aspelund, T. Tanaka, U. Lendeckel, U. Völker, V. Gudnason, V. Chouraki, W. Koenig, Z. Kutalik, J. R O'Connell, A. Parsa, I. M. Heid, A. D. Paterson, I. H. de Boer, O. Devuyst, J. Lazar, K. Endlich, K. Susztak, J. Tremblay, P. Hamet, H. J. Jacob, C. A. Böger, C. S. Fox, C. Pattaro, A. Köttgen, Genome-wide association studies identify genetic loci associated with albuminuria in diabetes. *Diabetes* **65**, 803–817 (2016).

74. P. van der Harst, N. Verweij, Identification of 64 novel genetic loci provides an expanded view on the genetic architecture of coronary artery disease. *Circ. Res.* **122**, 433–443 (2018).
75. H. J. Watson, Z. Yilmaz, L. M. Thornton, C. Hübel, J. R. I. Coleman, H. A. Gaspar, J. Bryois, A. Hinney, V. M. Leppä, M. Mattheisen, S. E. Medland, S. Ripke, S. Yao, P. Giusti-Rodríguez; Anorexia Nervosa Genetics Initiative, K. B. Hanscombe, K. L. Purves; Eating Disorders Working Group of the Psychiatric Genomics Consortium, R. A. H. Adan, L. Alfredsson, T. Ando, O. A. Andreassen, J. H. Baker, W. H. Berrettini, I. Boehm, C. Boni, V. B. Perica, K. Buehren, R. Burghardt, M. Cassina, S. Cichon, M. Clementi, R. D. Cone, P. Courtet, S. Crow, J. J. Crowley, U. N. Danner, O. S. P. Davis, M. de Zwaan, G. Dedoussis, D. Degortes, J. E. De Socio, D. M. Dick, D. Dikeos, C. Dina, M. Dmitrzak-Weglarz, E. Docampo, L. E. Duncan, K. Egberts, S. Ehrlich, G. Escaramís, T. Esko, X. Estivill, A. Farmer, A. Favaro, F. Fernández-Aranda, M. M. Fichter, K. Fischer, M. Föcker, L. Foretova, A. J. Forstner, M. Forzan, C. S. Franklin, S. Gallinger, I. Giegling, J. Giuranna, F. Gonidakis, P. Gorwood, M. G. Mayora, S. Guillaume, Y. Guo, H. Hakonarson, K. Hatzikotoulas, J.



Hauser, J. Hebebrand, S. G. Helder, S. Herms, B. Herpertz-Dahlmann, W. Herzog, L. M. Huckins, J. I. Hudson, H. Imgart, H. Inoko, V. Janout, S. Jiménez-Murcia, A. Julià, G. Kalsi, D. Kaminská, J. Kaprio, L. Karhunen, A. Karwautz, M. J. H. Kas, J. L. Kennedy, A. Keski-Rahkonen, K. Kiezebrink, Y.-R. Kim, L. Klareskog, K. L. Klump, G. P. S. Knudsen, M. C. La Via, S. L. Hellard, R. D. Levitan, D. Li, L. Lilienfeld, B. D. Lin, J. Lissowska, J. Luykx, P. J. Magistretti, M. Maj, K. Mannik, S. Marsal, C. R. Marshall, M. Mattingsdal, S. M. Devitt, P. M. Guffin, A. Metspalu, I. Meulenbelt, N. Micali, K. Mitchell, A. M. Monteleone, P. Monteleone, M. A. Munn-Chernoff, B. Nacmias, M. Navratilova, I. Ntalla, J. K. O'Toole, R. A. Ophoff, L. Padyukov, A. Palotie, J. Pantel, H. Papezova, D. Pinto, R. Rabionet, A. Raevuori, N. Ramoz, T. Reichborn-Kjennerud, V. Ricca, S. Ripatti, F. Ritschel, M. Roberts, A. Rondo, D. Rujescu, F. Rybakowski, P. Santonastaso, A. Scherag, S. W. Scherer, U. Schmidt, N. J. Schork, A. Schosser, J. Seitz, L. Slachtova, P. E. Slagboom, M. C. T. Slof-Op 't Landt, A. Slopien, S. Sorbi, B. Świątkowska, J. P. Szatkiewicz, I. Tachmazidou, E. Tenconi, A. Tortorella, F. Tozzi, J. Treasure, A. Tsitsika, M. Tyszkiewicz-Nwafor, K. Tziouvas, A. A. van Elburg, E. F. van Furth, G. Wagner, E. Walton, E. Widen, E. Zeggini, S. Zerwas, S. Zipfel, A. W. Bergen, J. M. Boden, H. Brandt, S. Crawford, K. A. Halmi, L. John Horwood, C. Johnson, A. S. Kaplan, W. H. Kaye, J. E. Mitchell, C. M. Olsen, J. F. Pearson, N. L. Pedersen, M. Strober, T. Werge, D. C. Whiteman, D. B. Woodside, G. D. Stuber, S. Gordon, J. Grove, A. K. Henders, A. Juréus, K. M. Kirk, J. T. Larsen, R. Parker, L. Petersen, J. Jordan, M. Kennedy, G. W. Montgomery, T. D. Wade, A. Birgegård, P. Lichtenstein, C. Noring, M. Landén, N. G. Martin, P. B. Mortensen, P. F. Sullivan, G. Breen, C. M. Bulik, Genome-wide association study identifies eight risk loci and implicates metabo-psychiatric origins for anorexia nervosa. *Nat. Genet.* **51**, 1207–1214 (2019).

76. N. R. Wray, S. Ripke, M. Mattheisen, M. Trzaskowski, E. M. Byrne, A. Abdellaoui, M. J. Adams, E. Agerbo, T. M. Air, T. M. F. Andlauer, S.-A. Bacanu, M. Bækvad-Hansen, A. F. T. Beekman, T. B. Bigdeli, E. B. Binder, D. R. H. Blackwood, J. Bryois, H. N. Buttenschøn, J. Bybjerg-Grauholm, N. Cai, E. Castelao, J. H. Christensen, T.-K. Clarke, J. I. R. Coleman, L. Colodro-Conde, B. Couvy-Duchesne, N. Craddock, G. E. Crawford, C. A. Crowley, H. S. Dashti, G. Davies, I. J. Deary, F. Degenhardt, E. M. Derks, N. Direk, C. V. Dolan, E. C. Dunn, T. C. Eley, N. Eriksson, V. Escott-Price, F. H. F. Kiadeh, H. K. Finucane, A. J. Forstner, J. Frank, H. A. Gaspar, M. Gill, P. Giusti-Rodríguez, F. S. Goes, S. D. Gordon, J.

Grove, L. S. Hall, E. Hannon, C. S. Hansen, T. F. Hansen, S. Herms, I. B. Hickie, P. Hoffmann, G. Homuth, C. Horn, J.-J. Hottenga, D. M. Hougaard, M. Hu, C. L. Hyde, M. Ising, R. Jansen, F. Jin, E. Jorgenson, J. A. Knowles, I. S. Kohane, J. Kraft, W. W. Kretzschmar, J. Krogh, Z. Kutalik, J. M. Lane, Y. Li, Y. Li, P. A. Lind, X. Liu, L. Lu, D. J. MacIntyre, D. F. MacKinnon, R. M. Maier, W. Maier, J. Marchini, H. Mbarek, P. M. Grath, P. M. Guffin, S. E. Medland, D. Mehta, C. M. Middeldorp, E. Mihailov, Y. Milaneschi, L. Milani, J. Mill, F. M. Mondimore, G. W. Montgomery, S. Mostafavi, N. Mullins, M. Nauck, B. Ng, M. G. Nivard, D. R. Nyholt, P. F. O'Reilly, H. Oskarsson, M. J. Owen, J. N. Painter, C. B. Pedersen, M. G. Pedersen, R. E. Peterson, E. Pettersson, W. J. Peyrot, G. Pistis, D. Posthuma, S. M. Purcell, J. A. Quiroz, P. Qvist, J. P. Rice, B. P. Riley, M. Rivera, S. S. Mirza, R. Saxena, R. Schoevers, E. C. Schulte, L. Shen, J. Shi, S. I. Shyn, E. Sigurdsson, G. B. C. Sinnamon, J. H. Smit, D. J. Smith, H. Stefansson, S. Steinberg, C. A. Stockmeier, F. Streit, J. Strohmaier, K. E. Tansey, H. Teismann, A. Teumer, W. Thompson, P. A. Thomson, T. E. Thorgeirsson, C. Tian, M. Traylor, J. Treutlein, V. Trubetskoy, A. G. Uitterlinden, D. Umbrecht, S. Van der Auwera, A. M. van Hemert, A. Viktorin, P. M. Visscher, Y. Wang, B. T. Webb, S. M. Weinsheimer, J. Wellmann, G. Willemsen, S. H. Witt, Y. Wu, H. S. Xi, J. Yang, F. Zhang; eQTLGen; 23andMe, V. Arolt, B. T. Baune, K. Berger, D. I. Boomsma, S. Cichon, U. Dannlowski, E. C. J. de Geus, J. R. De Paulo, E. Domenici, K. Domschke, T. Esko, H. J. Grabe, S. P. Hamilton, C. Hayward, A. C. Heath, D. A. Hinds, K. S. Kendler, S. Kloiber, G. Lewis, Q. S. Li, S. Lucae, P. F. A. Madden, P. K. Magnusson, N. G. Martin, A. M. Mc Intosh, A. Metspalu, O. Mors, P. B. Mortensen, B. Müller-Myhsok, M. Nordentoft, M. M. Nöthen, M. C. O'Donovan, S. A. Paciga, N. L. Pedersen, B. W. J. H. Penninx, R. H. Perlis, D. J. Porteous, J. B. Potash, M. Preisig, M. Rietschel, C. Schaefer, T. G. Schulze, J. W. Smoller, K. Stefansson, H. Tiemeier, R. Uher, H. Völzke, M. M. Weissman, T. Werge, A. R. Winslow, C. M. Lewis, D. F. Levinson, G. Breen, A. D. Børglum, P. F. Sullivan; the Major Depressive Disorder Working Group of the Psychiatric Genomics Consortium, Genome-wide association analyses identify 44 risk variants and refine the genetic architecture of major depression. *Nat. Genet.* **50**, 668–681 (2018).

77. A. Xue, Y. Wu, Z. Zhu, F. Zhang, K. E. Kemper, Z. Zheng, L. Yengo, L. R. Lloyd-Jones, J. Sidorenko, Y. Wu; eQTLGen Consortium, A. F. Mc Rae, P. M. Visscher, J. Zeng, J. Yang,

Genome-wide association analyses identify 143 risk variants and putative regulatory mechanisms for type 2 diabetes. *Nat. Commun.* **9**, 2941 (2018).

78. L. Yengo, J. Sidorenko, K. E. Kemper, Z. Zheng, A. R. Wood, M. N. Weedon, T. M. Frayling, J. Hirschhorn, J. Yang, P. M. Visscher; GIANT Consortium, Meta-analysis of genome-wide association studies for height and body mass index in approximately 700000 individuals of European ancestry. *Hum. Mol. Genet.* **27**, 3641–3649 (2018).
79. International League Against Epilepsy Consortium on Complex Epilepsies, Genetic determinants of common epilepsies: A meta-analysis of genome-wide association studies. *Lancet Neurol.* **13**, 893–903 (2014).
80. A. Okbay, B. M. L. Baselmans, J.-E. De Neve, P. Turley, M. G. Nivard, M. A. Fontana, S. F. W. Meddens, R. K. Linnér, C. A. Rietveld, J. Derringer, J. Gratten, J. J. Lee, J. Z. Liu, R. de Vlaming, T. S. Ahluwalia, J. Buchwald, A. Cavadino, A. C. Frazier-Wood, N. A. Furlotte, V. Garfield, M. H. Geisel, J. R. Gonzalez, S. Haitjema, R. Karlsson, Sander W van der Laan, K.-H. Ladwig, J. Lahti, S. J. van der Lee, P. A. Lind, T. Liu, L. Matteson, E. Mihailov, M. B. Miller, C. C. Minica, I. M. Nolte, D. Mook-Kanamori, P. J. van der Most, C. Oldmeadow, Y. Qian, O. Raitakari, R. Rawal, A. Realo, R. Rueedi, B. Schmidt, A. V. Smith, E. Stergiakouli, T. Tanaka, K. Taylor, G. Thorleifsson, J. Wedenoja, J. Wellmann, H.-J. Westra, S. M. Willems, W. Zhao; Life Lines Cohort Study, N. Amin, A. Bakshi, S. Bergmann, G. Bjornsdottir, P. A. Boyle, S. Cherney, S. R. Cox, G. Davies, O. S. P. Davis, J. Ding, N. Direk, P. Eibich, R. T. Emeny, G. Fatemifar, J. D. Faul, L. Ferrucci, A. J. Forstner, C. Gieger, R. Gupta, T. B. Harris, J. M. Harris, E. G. Holliday, J.-J. Hottenga, P. L. De Jager, M. A. Kaakinen, E. Kajantie, V. Karhunen, I. Kolcic, M. Kumari, L. J. Launer, L. Franke, R. Li-Gao, D. C. Liewald, M. Koini, A. Loukola, P. Marques-Vidal, G. W. Montgomery, M. A. Mosing, L. Paternoster, A. Pattie, K. E. Petrovic, L. Pulkki-Råback, L. Quaye, K. Räikkönen, I. Rudan, R. J. Scott, J. A. Smith, A. R. Sutin, M. Trzaskowski, A. E. Vinkhuyzen, L. Yu, D. Zabaneh, J. R. Attia, D. A. Bennett, K. Berger, L. Bertram, D. I. Boomsma, H. Snieder, S.-C. Chang, F. Cucca, I. J. Deary, C. M. van Duijn, J. G. Eriksson, U. Bültmann, E. J. C. de Geus, P. J. F. Groenen, V. Gudnason, T. Hansen, C. A. Hartman, C. M. A. Haworth, C. Hayward, A. C. Heath, D. A. Hinds, E. Hyppönen, W. G. Iacono, M.-R. Jarvelin, K.-H. Jöckel, J. Kaprio, S. L. R. Kardia, L. Keltikangas-Järvinen, P. Kraft, L. D. Kubzansky, T. Lehtimäki, P. K. E. Magnusson, N. G. Martin, M. M. Gue, A. Metspalu, M. Mills, R. de Mutsert, A. J.

Oldehinkel, G. Pasterkamp, N. L. Pedersen, R. Plomin, O. Polasek, C. Power, S. S. Rich, F. R. Rosendaal, H. M. den Ruijter, D. Schlessinger, H. Schmidt, R. Svento, R. Schmidt, B. Z. Alizadeh, T. I. A. Sørensen, T. D. Spector, J. M. Starr, K. Stefansson, A. Steptoe, A. Terracciano, U. Thorsteinsdottir, A. R. Thurik, N. J. Timpson, H. Tiemeier, A. G. Uitterlinden, P. Vollenweider, G. G. Wagner, D. R. Weir, J. Yang, D. C. Conley, G. D. Smith, A. Hofman, M. Johannesson, D. I. Laibson, S. E. Medland, M. N. Meyer, J. K. Pickrell, T. Esko, R. F. Krueger, J. P. Beauchamp, P. D. Koellinger, D. J. Benjamin, M. Bartels, D. Cesarini, Genetic variants associated with subjective well-being, depressive symptoms, and neuroticism identified through genome-wide analyses. *Nat. Genet.* **48**, 624–633 (2016).

81. Schizophrenia Working Group of the Psychiatric Genomics Consortium, Biological insights from 108 schizophrenia-associated genetic loci. *Nature* **511**, 421–427 (2014).
